# Supplementary material for: Preparation of Large Conjugated Polybenzimidazole Fluorescent Materials and Their Application in Metal Ion Detection
Source: MDPI journal article supplement (doi:10.3390/polym13183091), 2021-09-14
Supplement: s1 [file s1]

# Supplementary Materials

## Preparation of Large Conjugated Polybenzimidazole Fluorescent Materials and their Application in Metal Ion Detection

Xi-Ying Cao<sup>1</sup>, Chu-Ming Pang<sup>1,2,\*</sup>, Ying Xiao<sup>1</sup>, Wan-Qing Xiao<sup>1</sup>, Shi-He Luo<sup>1,\*</sup>, Jin-Ping He<sup>1</sup>, Zhao-Yang Wang<sup>1,\*</sup>

<sup>1</sup> School of Chemistry, South China Normal University, Key Laboratory of Theoretical Chemistry of Environment, Ministry of Education; Guangzhou Key Laboratory of Analytical Chemistry for Biomedicine, Guangzhou 510006, P. R. China.

<sup>2</sup> School of Health Medicine, Guangzhou Huashang College, Guangzhou 511300, P. R. China.

\* Corresponding Author: Zhao-Yang Wang, 19951088@m.scnu.edu.cn. Tel: 8620-39310258, luoshihescnu@m.scnu.edu.cn, 2017021874@m.scnu.edu.cn.

### Contents

|                                                                                                                 |    |
|-----------------------------------------------------------------------------------------------------------------|----|
| 1. Experimental section.....                                                                                    | 3  |
| 2. Characterization spectra and data of CPBIs (Figures. S1-S6).....                                             | 5  |
| 3. The <sup>1</sup> H NMR spectra of CPBIs with different molar feed ratios (Figure S7).....                    | 11 |
| 4. The FT-IR spectra of CPBIs with different molar feed ratios (Figure S8).....                                 | 12 |
| 5. The full XPS spectra of CPBI <sub>2</sub> and its C1s, N1s peaks (Figure S9).....                            | 13 |
| 6. The effects of different feed ratios on serial CPBI <sub>n</sub> (Table S1).....                             | 14 |
| 7. The XRD analysis of CPBIs with different molar feed ratios (Figure S10).....                                 | 15 |
| 8. TG analysis of serial CPBIs with different molar feed ratios (Figure S11 and Table S2).....                  | 16 |
| 9. The SEM analysis of CPBIs with different molar feed ratios (Figure S12).....                                 | 18 |
| 10. Fluorescence spectra of CPBI <sub>n</sub> with different alkylation ratios (Table S3).....                  | 19 |
| 11. Effects of different solvent systems on the fluorescence properties of CPBI <sub>n</sub> (Figure S13).....  | 20 |
| 12. Effects of different water content on the fluorescence properties of CPBI <sub>n</sub> (Figure S14).....    | 21 |
| 13. The competitive experiments of CPBI <sub>2</sub> for Cu <sup>2+</sup> or Zn <sup>2+</sup> (Figure S15)..... | 22 |
| 14. The selective experiments of CPBI <sub>1</sub> towards metal ions (Figure S16).....                         | 23 |
| 15. The competitive experiments of CPBI <sub>1</sub> for Cu <sup>2+</sup> or Zn <sup>2+</sup> (Figure S17)..... | 24 |

|                                                                                                                                                                          |    |
|--------------------------------------------------------------------------------------------------------------------------------------------------------------------------|----|
| 16. Fluorescent titration and detection limit of <b>CPBI<sub>1</sub></b> for Cu <sup>2+</sup> ( <b>Figure S18</b> ).....                                                 | 25 |
| 17. Fluorescent titration and detection limit of <b>CPBI<sub>1</sub></b> for Zn <sup>2+</sup> ( <b>Figure S19</b> ).....                                                 | 26 |
| 18. The selective experiments of <b>CPBI<sub>3</sub></b> towards metal ions ( <b>Figure S20</b> ).....                                                                   | 27 |
| 19. The competitive experiments of <b>CPBI<sub>3</sub></b> for Cu <sup>2+</sup> or Zn <sup>2+</sup> ( <b>Figure S21</b> ).....                                           | 28 |
| 20. Fluorescent titration and detection limit of <b>CPBI<sub>3</sub></b> for Cu <sup>2+</sup> ( <b>Figure. S22</b> ).....                                                | 29 |
| 21. Fluorescent titration and detection limit of <b>CPBI<sub>3</sub></b> for Zn <sup>2+</sup> ( <b>Figure S23</b> ).....                                                 | 30 |
| 22. The selective experiments of <b>CPBI<sub>4</sub></b> towards metal ions ( <b>Figure S24</b> ).....                                                                   | 31 |
| 23. The competitive experiments of <b>CPBI<sub>4</sub></b> for Cu <sup>2+</sup> or Zn <sup>2+</sup> ( <b>Figure S25</b> ).....                                           | 32 |
| 24. Fluorescent titration and detection limit of <b>CPBI<sub>4</sub></b> for Cu <sup>2+</sup> ( <b>Figure S26</b> ).....                                                 | 33 |
| 25. Fluorescent titration and detection limit of <b>CPBI<sub>4</sub></b> for Zn <sup>2+</sup> ( <b>Figure S27</b> ).....                                                 | 34 |
| 26. The plots of <b>CPBI<sub>4</sub></b> vs concentration of Cu <sup>2+</sup> and Zn <sup>2+</sup> ( <b>Figure S28</b> ).....                                            | 35 |
| 27. Comparison of detection limits of Cu <sup>2+</sup> and Zn <sup>2+</sup> by serial <b>CPBI<sub>n</sub></b> ( <b>Table S4</b> ).....                                   | 36 |
| 28. The changes of FT-IR spectra and morphology before or after the combination with analytes<br>( <b>Figures S29-S31</b> ).....                                         | 37 |
| 29. TCSPC plots for <b>CPBI<sub>2</sub></b> and <b>CPBI<sub>4</sub></b> interacted with Cu <sup>2+</sup> and Zn <sup>2+</sup> ( <b>Figure S32</b> ).....                 | 39 |
| 30. Comparison of <b>CPBI<sub>n</sub></b> with Cu <sup>2+</sup> and Zn <sup>2+</sup> probes available in the literature ( <b>Table S5</b> and <b>Table<br/>S6</b> )..... | 40 |

## 1. Experimental section

### 1.1. Chemicals and apparatus

All reagents and organic solvents were purchased from commercial suppliers and used without further purification.  $^1\text{H}$  NMR spectra of compounds were recorded on a Bruker 600 MHz instrument. Fluorescence spectra were carried out by a Hitachi F-4600 fluorescence spectrometer. The Scanning Electron Microscope was obtained by FEI Quanta 250 FEG field emission scanning electron microscope. The TG data were obtained by TG-209 F3 TG analyzer. Quantum yields were calculated by using quinine sulfate ( $\Phi_{\text{fl}}$ ) 0.55 in 0.5 M  $\text{H}_2\text{SO}_4$  solution as a standard. Fluorescence lifetime spectrum was obtained using time correlated single photon counting method.

### 1.2. Synthesis

#### 1.2.1. Synthesis of intermediate $\text{CPBI}_0$

According to the method in the reference [1-3], 20 mL polyphosphoric acid (PPA) and 3,3'-diaminobenzidine **1** were added into a 50 mL flask and heated at 160 °C for 2 h. After they were completely dissolved, 3.0 mmol *trans*-butenedioic acid (*E*-BA) **2** was added and the mixture was heated to 170 °C for 48 h. After cooling to room temperature, the pH was adjusted to alkaline with NaOH solution, and then a blue-black solid was obtained by the filtration.

#### 1.2.2. Synthesis of series $\text{CPBI}_n$

According to the method of reference [4-6], 1 mmol  $\text{CPBI}_0$ , different molar  $n\text{-C}_5\text{H}_{11}\text{Br}$ , 10 mL MeCN and moderate NaOH were added into the reaction flask. After refluxing for 24 hours, the organic solvent was evaporated *in vacuo*. The crude product was washed several times with plenty of water to remove NaOH, and then the alkylation product was treated by the mixture of methylene chloride and

ethanol. Once the organic phase was collected continuously, and the solvent was removed *in vacuo*. After the desired product was dried in a vacuum drying oven at 40 °C for 24 h, the purified soluble alkylation solid product **CPBI<sub>n</sub>** was obtained.

### 1.3. Methods

#### 1.3.1. General procedure for optical spectral measurements

The **CPBI<sub>n</sub>** samples were dissolved in DMSO to acquire stock solution. Then, **CPBI<sub>n</sub>** test solution (DMSO/H<sub>2</sub>O, V/V = 9/1) was prepared for fluorescence emission spectra at room temperature. Among them, 1 mg sample was dissolved in 15 mL mixed solvent.

#### 1.3.2. Limit of detection

As the reported method [7], the limit of detection (LOD) was measured by the equation:  $LOD = 3\delta/K$ . Therein,  $\delta$  is the standard deviation of the blank measurements ( $n = 10$ ), and the  $K$  is the slope of the calibration curve.

#### 1.3.3. SEM analysis

According to the reported method [8-10], the morphology for **CPBIs** and the morphology changes of **CPBI<sub>n</sub>** combined with metal ions were determined by field emission scanning electron microscope.

#### 1.3.4. XPS analysis

As the reported method [11-13], the combining energy of N1s, O1s and C1s in the product were measured by Axis Ultra-DLD X-ray photoelectron spectrometer.

## 2. Characterization spectra and data of CPBI<sub>0</sub> and serial CPBI<sub>n</sub>

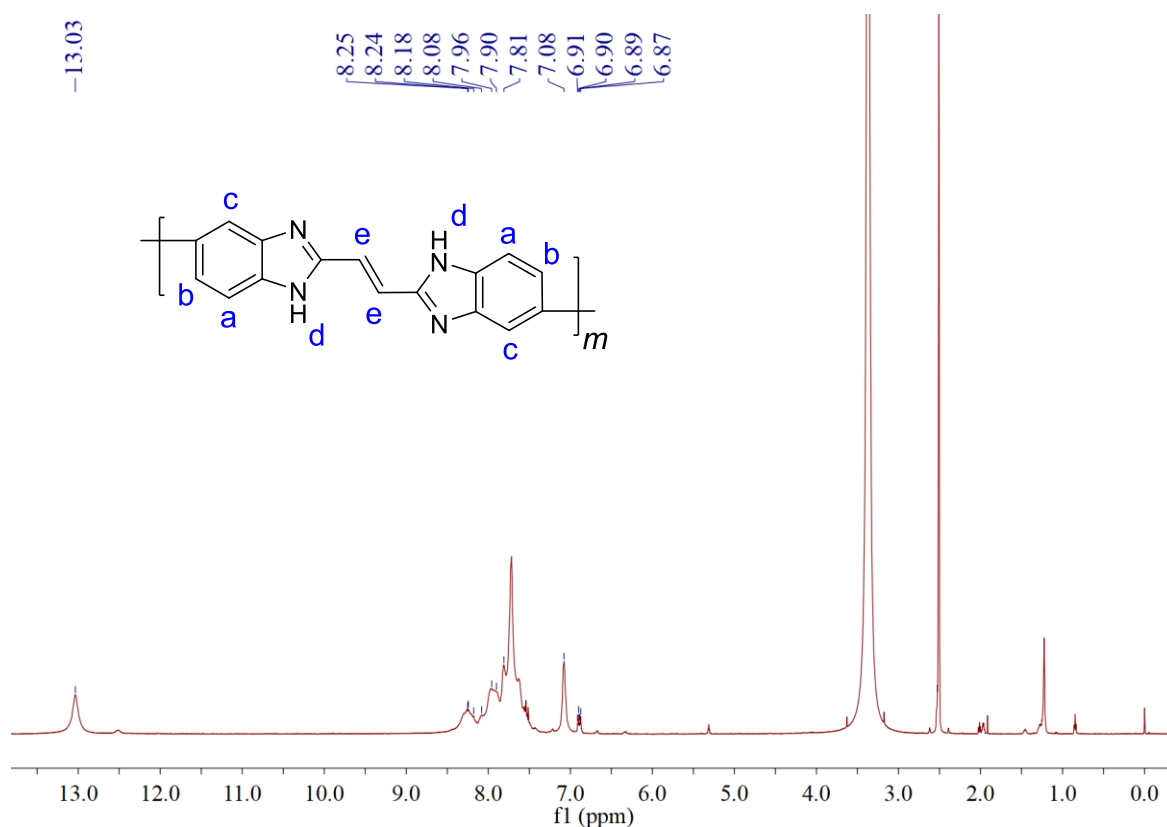

**Figure S1.** <sup>1</sup>H NMR spectrum of CPBI<sub>0</sub>.

**CPBI<sub>0</sub>**, blue-black solid, yield 82.1%; <sup>1</sup>H NMR (600 MHz, DMSO-*d*<sub>6</sub>,  $\delta$ , ppm): 6.87-7.08 (*m*, H<sub>e</sub>, =CH in main chain), 7.81-7.90 (*m*, H<sub>a</sub>, Ar-H in benzimidazole unit of main chain), 7.96-8.08 (*m*, H<sub>b</sub>, Ar-H in benzimidazole unit of main chain), 8.18-8.25 (*m*, H<sub>c</sub>, Ar-H in benzimidazole unit of main chain), 13.03 (*s*, H<sub>d</sub>, NH in benzimidazole unit of main chain); IR (KBr),  $\nu$ , cm<sup>-1</sup>: 3390, 3059, 1614, 1578, 1534, 1437, 1290, 1209, 956, 855, 802. According to the <sup>1</sup>H NMR result, the number-average molecular weight (*M<sub>n</sub>*) of **CPBI<sub>0</sub>** is calculated to be about 2000 Da.

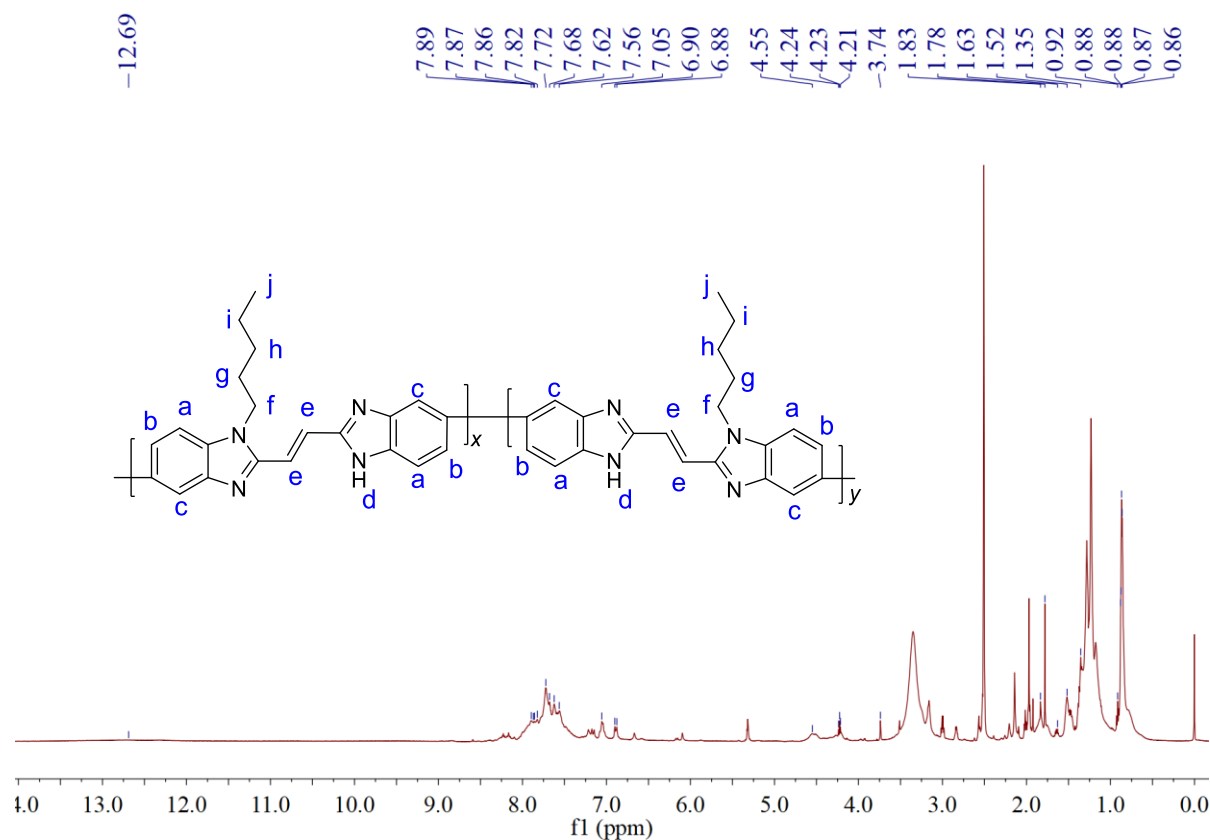

**Figure S2.** <sup>1</sup>H NMR spectrum of CPBI<sub>1</sub>.

**CPBI<sub>1</sub>**, brown solid, yield 26.0 %, <sup>1</sup>H NMR (600 MHz, DMSO-*d*<sub>6</sub>, δ, ppm): 0.86-0.92 (*m*, H<sub>j</sub>, CH<sub>3</sub> in *N*-alkyl chain), 1.35-1.62 (*m*, H<sub>i</sub>, H<sub>h</sub>, CH<sub>2</sub> in *N*-alkyl chain), 1.78-1.83 (*m*, H<sub>g</sub>, CH<sub>2</sub> in *N*-alkyl chain), 3.51-4.55 (*m*, H<sub>f</sub>, NCH<sub>2</sub> in *N*-alkyl chain), 6.88-7.21 (*s*, H<sub>e</sub>, =CH in main chain), 7.56-7.62 (*m*, H<sub>a</sub>, Ar-H in benzimidazole unit of main chain), 7.68-7.72 (*m*, H<sub>b</sub>, Ar-H in benzimidazole unit of main chain), 7.82-7.89 (*m*, H<sub>c</sub>, Ar-H in benzimidazole unit of main chain), 12.69 (*b*, H<sub>d</sub>, NH in benzimidazole unit of main chain). IR (KBr), ν, cm<sup>-1</sup>: 3382, 3075, 2954, 2923, 2854, 1659, 1616, 1574, 1466, 1372, 1297, 964, 860, 803. According to the <sup>1</sup>H NMR result, the number-average molecular weight (M<sub>n</sub>) of CPBI<sub>1</sub> is calculated to be about 2900 Da.

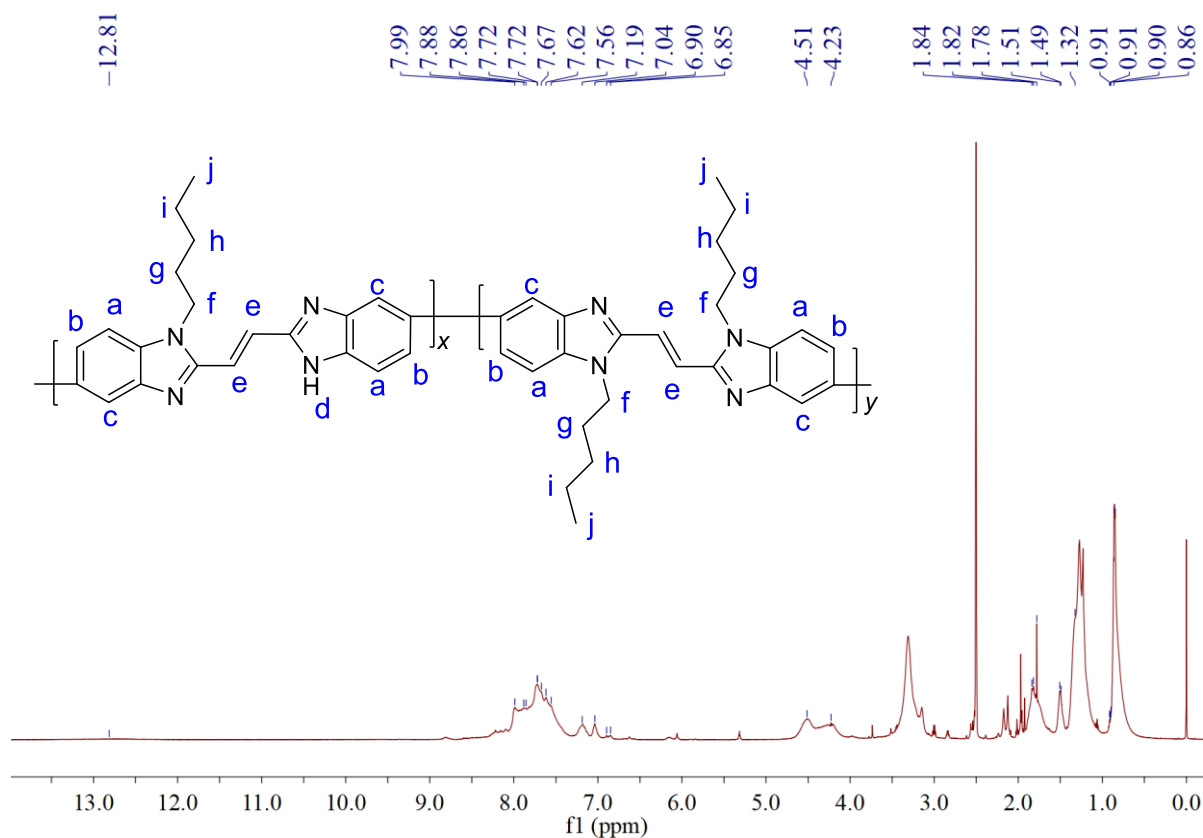

**Figure S3.**  $^1\text{H}$  NMR spectrum of CPBI<sub>2</sub>.

**CPBI<sub>2</sub>**, brownish-yellow solid, yield 54.2 %,  $^1\text{H}$  NMR (600 MHz, DMSO- $d_6$ ,  $\delta$ , ppm): 0.86-0.91 (*m*, H<sub>j</sub>, CH<sub>3</sub> in *N*-alkyl chain), 1.32-1.51 (*m*, H<sub>h</sub>, H<sub>i</sub>, CH<sub>2</sub> in *N*-alkyl chain), 1.78-1.84 (*m*, H<sub>g</sub>, CH<sub>2</sub> in *N*-alkyl chain), 4.23-4.51 (*m*, H<sub>f</sub>, NCH<sub>2</sub> in *N*-alkyl chain), 6.85-7.19 (*s*, H<sub>e</sub>, =CH in main chain), 7.56-7.62 (*m*, H<sub>a</sub>, Ar-H in benzimidazole unit of main chain), 7.67-7.72 (*m*, H<sub>b</sub>, Ar-H in benzimidazole unit of main chain), 7.88-7.99 (*m*, H<sub>c</sub>, Ar-H in benzimidazole unit of main chain), 12.81 (*b*, H<sub>d</sub>, NH in benzimidazole unit of main chain); IR (KBr),  $\nu$ ,  $\text{cm}^{-1}$ : 3390, 3054, 2955, 2927, 2853, 1654, 1617, 1568, 1461, 1327, 1229, 957, 857, 801, 724. According to the  $^1\text{H}$  NMR result, the number-average molecular weight ( $M_n$ ) of CPBI<sub>2</sub> is calculated to be about 3500 Da.

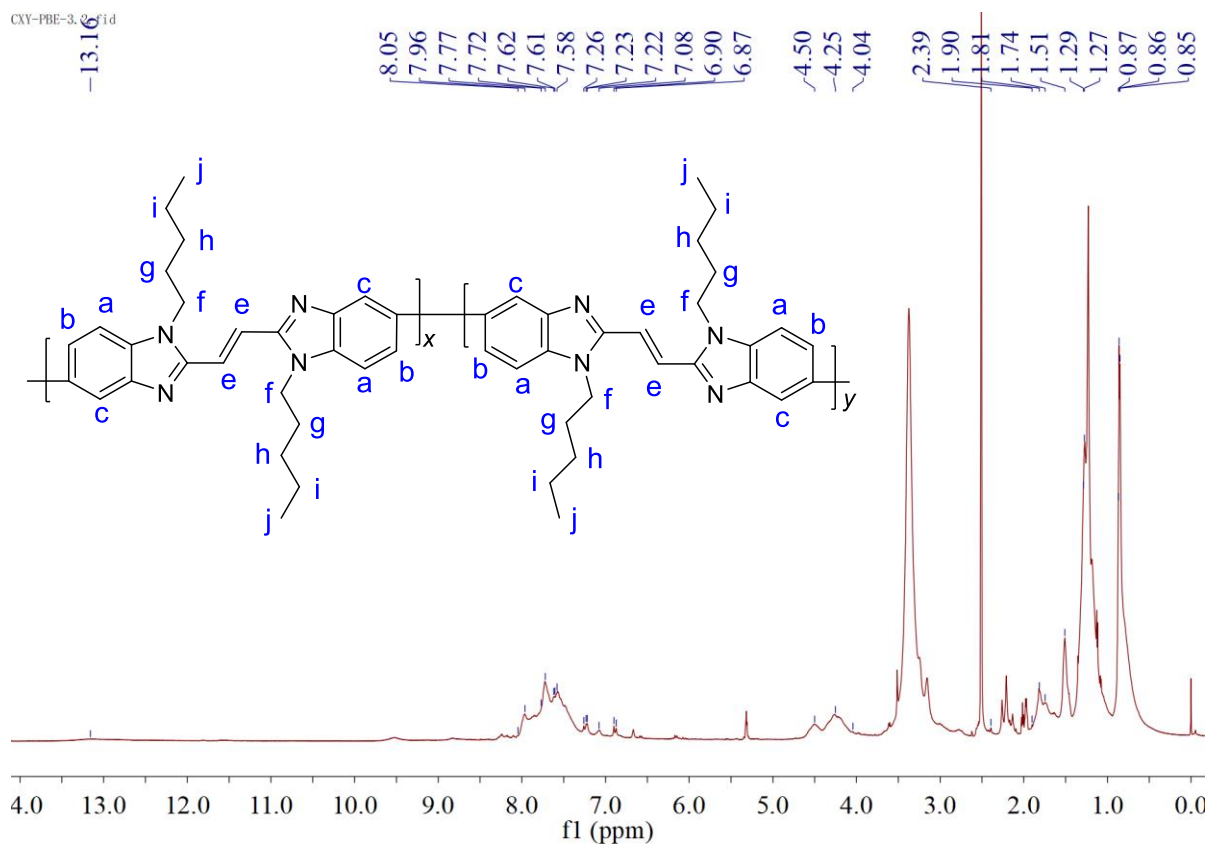

**Figure S4.**  $^1\text{H}$  NMR spectrum of **CPBI<sub>3</sub>**.

**CPBI<sub>3</sub>**, orange solid, yield 27.0 %,  $^1\text{H}$  NMR (600 MHz,  $\text{DMSO}-d_6$ ,  $\delta$ , ppm): 0.85-0.87 (*m*,  $\text{H}_j$ ,  $\text{CH}_3$  in *N*-alkyl chain), 1.27-1.51 (*m*,  $\text{H}_h$ ,  $\text{H}_i$ ,  $\text{CH}_2$  in *N*-alkyl chain), 1.74-1.90 (*m*,  $\text{H}_g$ ,  $\text{CH}_2$  in *N*-alkyl chain), 4.04-4.50 (*m*,  $\text{H}_f$ ,  $\text{NCH}_2$  in *N*-alkyl chain), 6.87-7.26 (*s*,  $\text{H}_e$ ,  $=\text{CH}$  in main chain), 7.58-7.62 (*m*,  $\text{H}_a$ , Ar-H in benzimidazole unit of main chain), 7.72-7.77 (*m*,  $\text{H}_b$ , Ar-H in benzimidazole unit of main chain), 7.96-8.05 (*m*,  $\text{H}_c$ , Ar-H in benzimidazole unit of main chain), 13.16 (*b*,  $\text{H}_d$ , NH in benzimidazole unit of main chain); IR (KBr),  $\nu$ ,  $\text{cm}^{-1}$ : 3388, 3051, 2957, 2922, 2852, 1663, 1621, 1570, 1467, 1369, 1318, 963, 857, 795, 723. According to the  $^1\text{H}$  NMR result, the number-average molecular weight ( $M_n$ ) of **CPBI<sub>3</sub>** is calculated to be about 3700 Da.



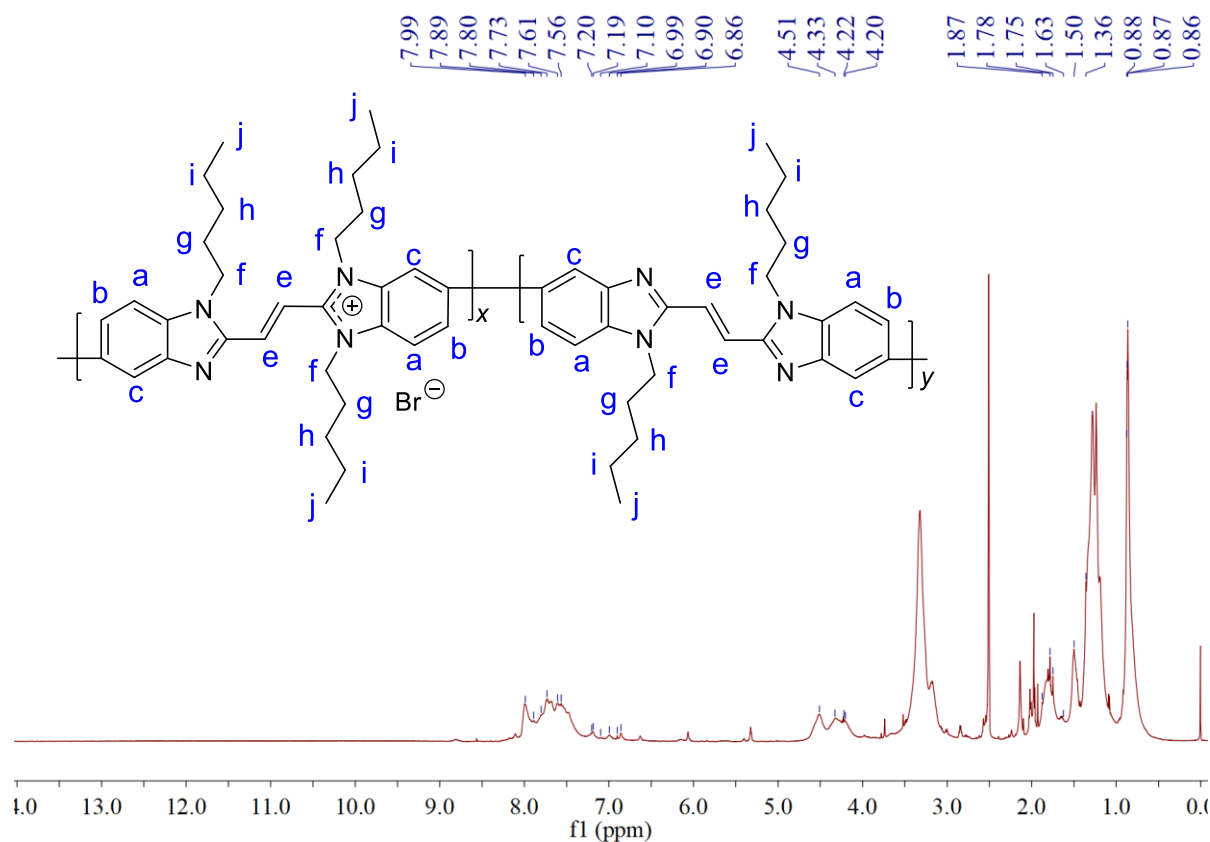

**Figure S5.**  $^1\text{H}$  NMR spectrum of **CPBI4**.

**CPBI4**, orange solid, yield 33.9 %,  $^1\text{H}$  NMR (600 MHz,  $\text{DMSO}-d_6$ ,  $\delta$ , ppm): 0.86-0.88 (*m*,  $\text{H}_j$ ,  $\text{CH}_3$  in *N*-alkyl chain), 1.36-1.63 (*m*,  $\text{H}_h$ ,  $\text{H}_i$ ,  $\text{CH}_2$  in *N*-alkyl chain), 1.75-1.87 (*m*,  $\text{H}_g$ ,  $\text{CH}_2$  in *N*-alkyl chain), 4.20-4.51 (*m*,  $\text{H}_f$ ,  $\text{NCH}_2$  in *N*-alkyl chain), 6.86-7.20 (*s*,  $\text{H}_e$ ,  $=\text{CH}$  in main chain), 7.56-7.61 (*m*,  $\text{H}_a$ , Ar-H in benzimidazole unit of main chain), 7.73-7.80 (*m*,  $\text{H}_b$ , Ar-H in benzimidazole unit of main chain), 7.89-7.99 (*m*,  $\text{H}_c$ , Ar-H in benzimidazole unit of main chain); IR (KBr),  $\nu$ ,  $\text{cm}^{-1}$ : 3375, 3052, 2956, 2925, 2856, 1661, 1615, 1571, 1466, 1371, 1320, 961, 850, 802, 724. According to the  $^1\text{H}$  NMR result, the number-average molecular weight ( $M_n$ ) of **CPBI4** is calculated to be about 4300 Da.

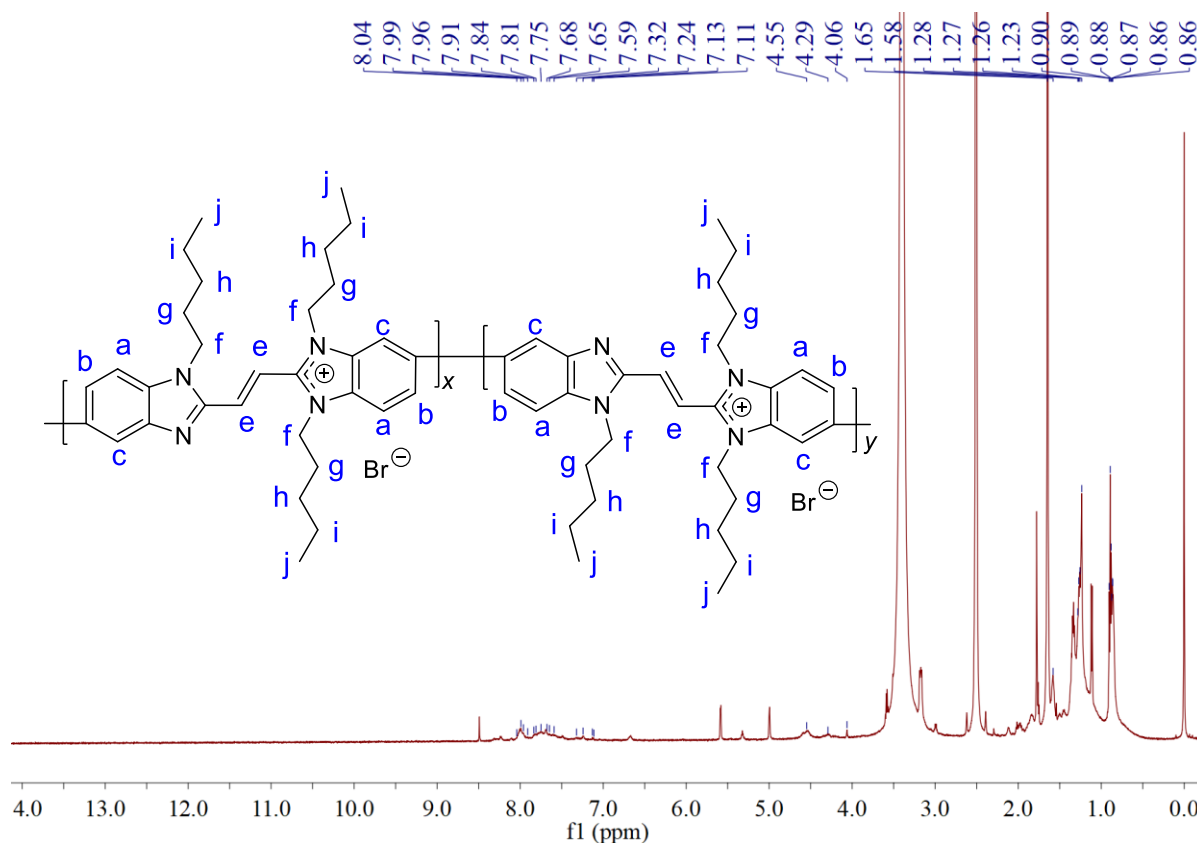

**Figure S6.**  $^1\text{H}$  NMR spectrum of **CPBI<sub>5</sub>**.

**CPBI<sub>5</sub>**, yellow solid, yield 77.4 %,  $^1\text{H}$  NMR (600 MHz,  $\text{DMSO-}d_6$ ,  $\delta$ , ppm): 0.86-0.90 (*m*,  $\text{H}_j$ ,  $\text{CH}_3$  in *N*-alkyl chain), 1.23-1.28 (*m*,  $\text{H}_h$ ,  $\text{H}_i$ ,  $\text{CH}_2$  in *N*-alkyl chain), 1.58-1.65 (*m*,  $\text{H}_g$ ,  $\text{CH}_2$  in *N*-alkyl chain), 4.06-4.55 (*m*,  $\text{H}_f$ ,  $\text{NCH}_2$  in *N*-alkyl chain), 7.11-7.23 (*s*,  $\text{H}_e$ ,  $=\text{CH}$  in main chain), 7.59-7.68 (*m*,  $\text{H}_a$ , Ar-H in benzimidazole unit of main chain), 7.75-7.84 (*m*,  $\text{H}_b$ , Ar-H in benzimidazole unit of main chain), 7.91-8.04 (*m*,  $\text{H}_c$ , Ar-H in benzimidazole unit of main chain), IR (KBr),  $\nu$ ,  $\text{cm}^{-1}$ : 3394, 3003, 2951, 2923, 2850, 1603, 1547, 1450, 1450, 1410, 1324, 1010, 922, 848, 646, 618. According to the  $^1\text{H}$  NMR result, the number-average molecular weight ( $M_n$ ) of **CPBI<sub>5</sub>** is calculated to be about 5100 Da.

**CPBI<sub>6</sub>**, yellow solid, yield 73.5 %; IR (KBr),  $\nu$ ,  $\text{cm}^{-1}$ : 3424, 3005, 2929, 2862, 2502, 2188 1628, 1587, 1526, 1436, 1392, 1047, 1009, 920, 878, 652, 619.

**CPBI<sub>7</sub>**, yellowish solid, yield 74.3 %; IR (KBr),  $\nu$ ,  $\text{cm}^{-1}$ : 3386, 2965, 2937, 2871, 2498, 2188, 1672, 1630, 1541, 1495, 1387, 1046, 1017, 921, 877, 651, 617.

### 3. The $^1\text{H}$ NMR spectra of CPBIs with different molar feed ratios

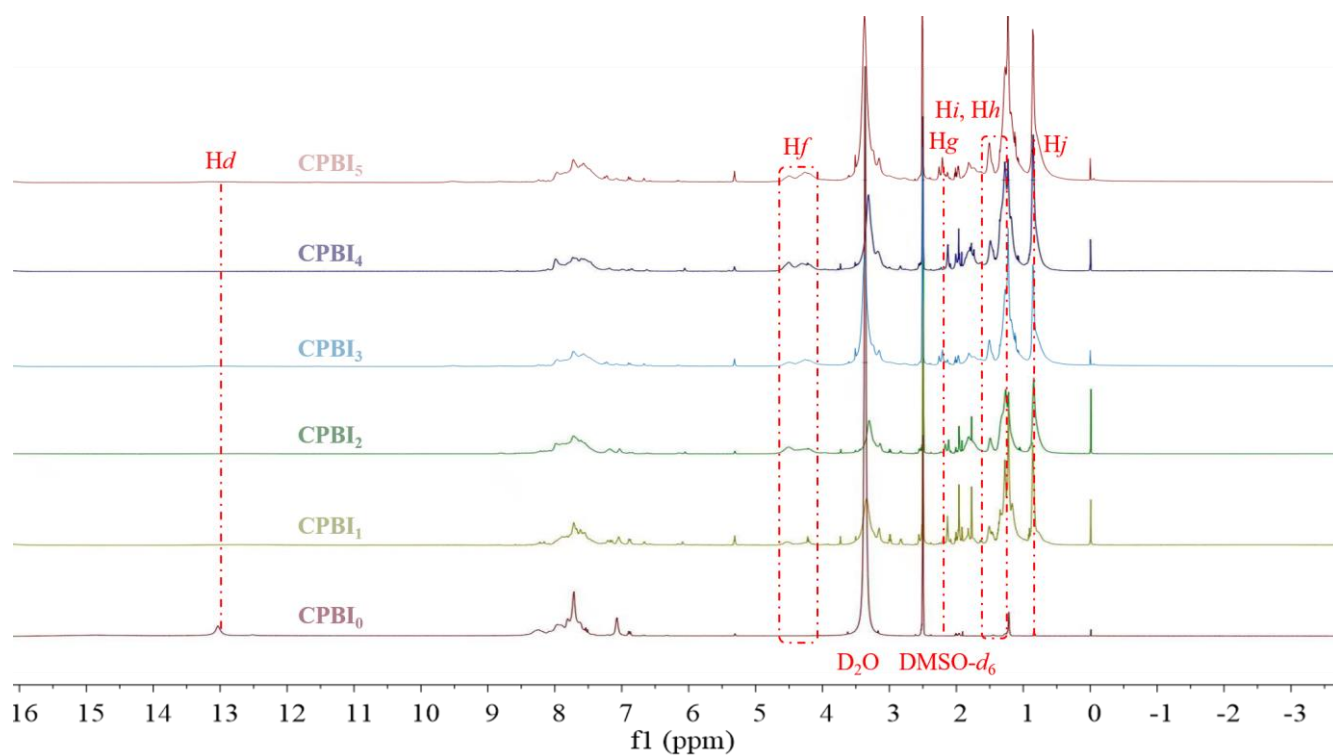

**Figure S7.** The changes of  $^1\text{H}$  NMR spectra of **CPBIs** with different molar feed ratios  $[n(\text{C}_5\text{H}_{11}\text{Br})/n(\text{CPBI}_0)]$ .

#### 4. The FT-IR spectra of CPBIs with different molar feed ratios

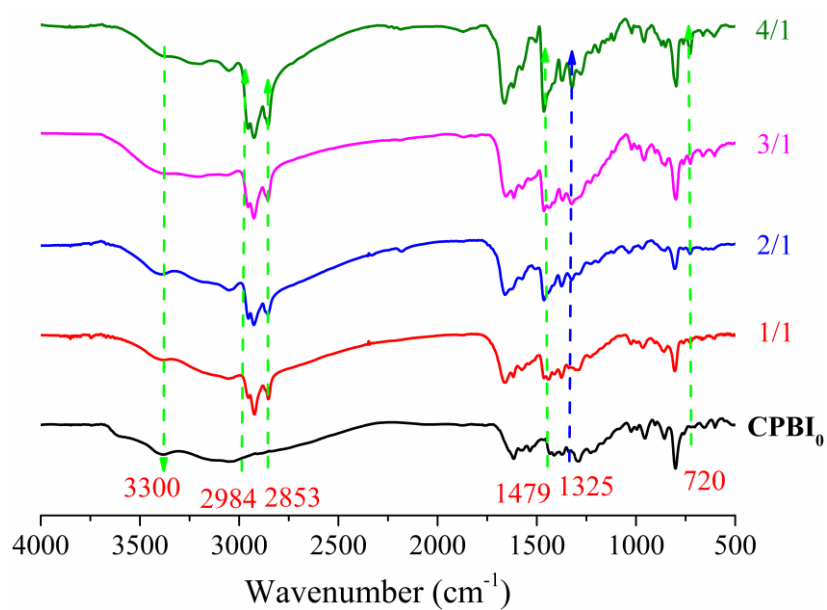

**Figure S8.** The FT-IR spectra of **CPBIs** with different molar feed ratios  $[n(\text{C}_5\text{H}_{11}\text{Br})/n(\text{CPBI}_0)]$ .

## 5. The full XPS spectra of CPBI<sub>2</sub> and its C1s, N1s peaks

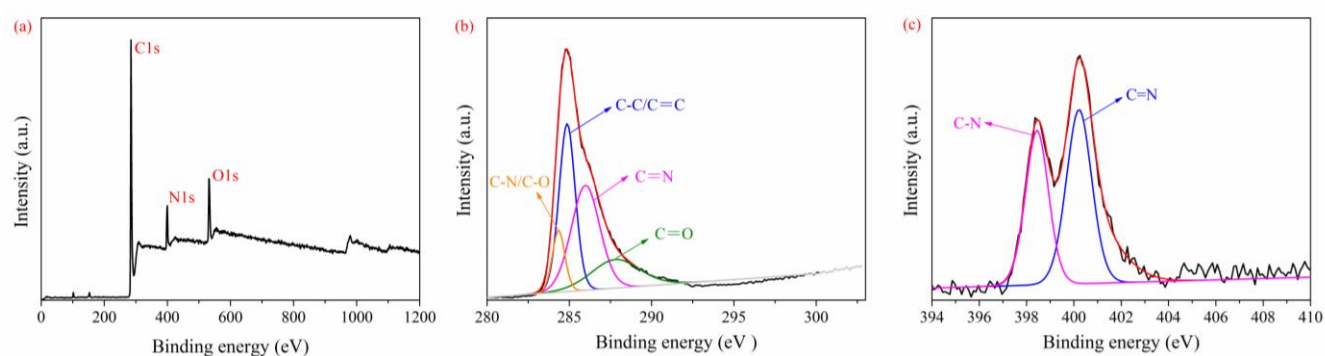

**Figure S9.** The full XPS spectra of CPBI<sub>2</sub> (a) and its C1s (b), N1s (c) peaks.

## 6. The effects of different feed ratios on serial CPBI<sub>n</sub>

**Table S1.** The effects of different feed ratios on yield, color and actual alkylation rate of CPBI<sub>n</sub>.

| Sample No.        | Feed ratio<br>(RBr/CPBI <sub>0</sub> ) | Yield (%) | Appearance of<br>product | Actual alkylation<br>rate (%) | Mn (Da) |
|-------------------|----------------------------------------|-----------|--------------------------|-------------------------------|---------|
| CPBI <sub>1</sub> | 1:1                                    | 26.0      | Brown                    | 23.3                          | 2900    |
| CPBI <sub>2</sub> | 2:1                                    | 54.2      | Brownish yellow          | 37.4                          | 3500    |
| CPBI <sub>3</sub> | 3:1                                    | 27.0      | Orange yellow            | 43.7                          | 3700    |
| CPBI <sub>4</sub> | 4:1                                    | 33.9      | Orange yellow            | 58.2                          | 4300    |
| CPBI <sub>5</sub> | 5:1                                    | 77.4      | Yellow                   | 77.2                          | 5100    |
| CPBI <sub>6</sub> | 6:1                                    | 73.5      | Yellow                   | -                             | -       |
| CPBI <sub>7</sub> | 7:1                                    | 74.3      | Yellowish                | -                             | -       |

## 7. The XRD analysis of CPBIs with different molar feed ratios

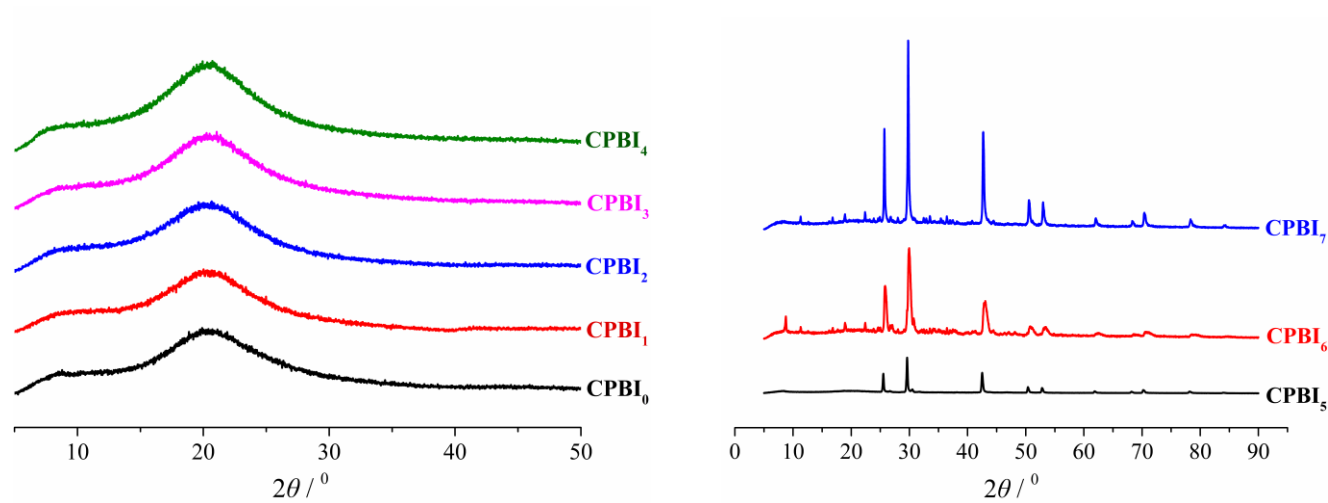

**Figure S10.** The XRD analysis of **CPBI<sub>n</sub>** with different molar feed ratios [ $n(\text{C}_5\text{H}_{11}\text{Br})/n(\text{CPBI}_0)$ ].

## 8. TG analysis of serial CPBIs with different molar feed ratios

The thermal stability of polybenzimidazole modified by alkyl chain needs to be further investigated with the help of thermogravimetric analyzer in O<sub>2</sub> atmosphere. The results are shown as **Figure S11**.

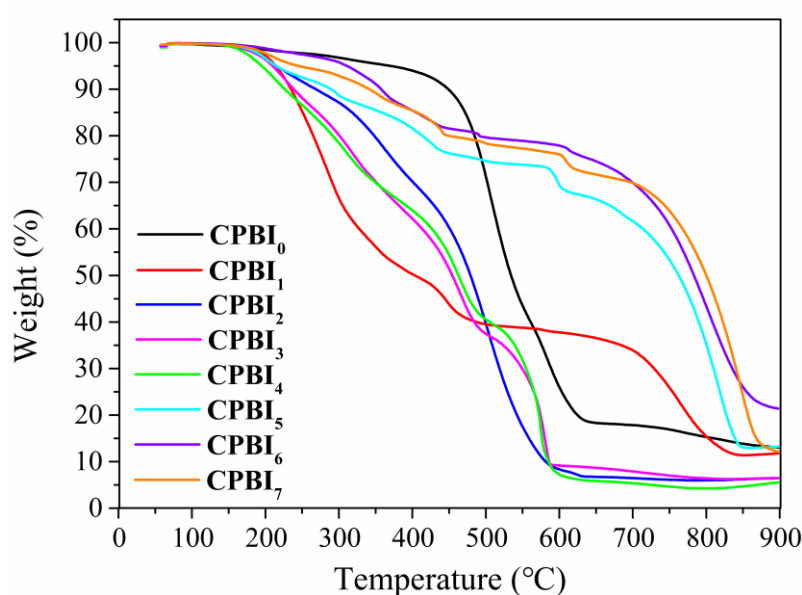

**Figure S11.** TG analysis of CPBIs with different molar feed ratios [ $n(\text{C}_5\text{H}_{11}\text{Br})/n(\text{CPBI}_0)$ ].

It can be seen that, **CPBI<sub>0</sub>** itself has high thermal stability, the initial temperature of thermal decomposition is 468.5 °C, the termination temperature is 654.2 °C, and the thermal weight loss rate reaches 90.45% (**Table S2**).

After the *N*-alkylation reaction of **CPBI<sub>0</sub>**, the initial decomposition temperature of **CPBI<sub>n</sub>** is significantly reduced. It may be due to that, after the *N*-alkylation reaction, the obtained polymers first decompose the introduced alkyl chain part when the temperature rises, and the decomposition temperature of the alkyl chain is lower than that of the main chain. Therefore, when  $n(\text{C}_5\text{H}_{11}\text{Br})/n(\text{CPBI}_0)$  is 1/1, the decomposition temperature is 208.8 °C, and the thermal decomposition temperature continues to decrease with the increase of alkylation rate.



**Table S2.** The thermal decomposition temperatures of **CPBIs** with different feed ratios.

| Feed ratio<br>(RBr/CPBI <sub>0</sub> ) | Initial temperature<br>(°C) | Terminal temperature<br>(°C) | Thermo-gravimetric rate<br>(%) |
|----------------------------------------|-----------------------------|------------------------------|--------------------------------|
| <b>CPBI<sub>0</sub></b>                | 468.5                       | 654.2                        | 90.45                          |
| 1:1                                    | 208.8                       | 831.4                        | 87.83                          |
| 2:1                                    | 169.1                       | 574.3                        | 93.28                          |
| 3:1                                    | 164.7                       | 586.7                        | 93.16                          |
| 4:1                                    | 163.2                       | 576.3                        | 93.42                          |
| 5:1                                    | 162.0                       | 838.9                        | 86.00                          |
| 6:1                                    | 173.6                       | 848.2                        | 77.92                          |
| 7:1                                    | 176.5                       | 867.3                        | 87.70                          |

However, once the *N*-alkylation reaction is high enough, the obtained polymer is quaternary ammonium (**Table 1**, in the main text). This enables the polymer to have certain crystallinity (see the corresponding discussion in the main text), leading to the continuous increase of the initial and termination temperature of thermal decomposition of the polymer **CPBI<sub>5</sub> ~ CPBI<sub>7</sub>**. In particular, the termination temperature of thermal decomposition of polymer increases significantly. For **CPBI<sub>7</sub>**, the termination temperature of thermal decomposition is as high as 867.3 °C (**Table S2**). The results are in good agreement with the results of XRD test.

## 9. The SEM analysis of CPBIs with different molar feed ratios

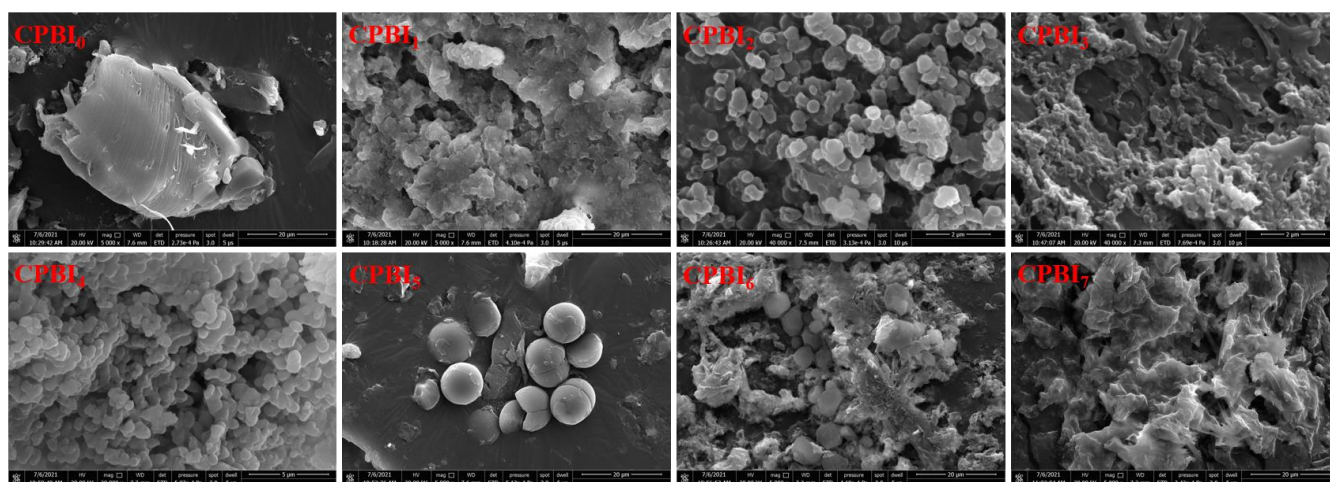

**Figure S12.** SEM analysis of CPBI<sub>n</sub> with different molar feed ratios.

## 10. Fluorescence spectra of CPBI<sub>n</sub> with different alkylation ratios

**Table S3.** Photophysical properties of CPBI<sub>n</sub> with different feed ratios.

| Compounds         | Solution                                  |                                          |                                |                                     | Solid                                    |                                | Photo images                                                                          |
|-------------------|-------------------------------------------|------------------------------------------|--------------------------------|-------------------------------------|------------------------------------------|--------------------------------|---------------------------------------------------------------------------------------|
|                   | $\lambda_{\text{abs}}^{\text{a}}$<br>(nm) | $\lambda_{\text{em}}^{\text{b}}$<br>(nm) | $\Delta\nu^{\text{c}}$<br>(nm) | $\Phi_{\text{f}}^{\text{d}}$<br>(%) | $\lambda_{\text{em}}^{\text{b}}$<br>(nm) | $\Delta\nu^{\text{c}}$<br>(nm) |                                                                                       |
| CPBI <sub>1</sub> | 411                                       | 498                                      | 87                             | 12.43%                              | 582                                      | 207                            |    |
| CPBI <sub>2</sub> | 413                                       | 502                                      | 89                             | 16.15%                              | 604                                      | 229                            |    |
| CPBI <sub>3</sub> | 412                                       | 509                                      | 97                             | 13.45%                              | 580                                      | 205                            |   |
| CPBI <sub>4</sub> | 410                                       | 509                                      | 99                             | 21.31%                              | 577                                      | 202                            |  |
| CPBI <sub>5</sub> | 411                                       | 498                                      | 87                             | 13.88%                              | 563                                      | 188                            |  |
| CPBI <sub>6</sub> | 414                                       | 497                                      | 83                             | 11.76%                              | 560                                      | 185                            |  |
| CPBI <sub>7</sub> | 417                                       | 498                                      | 81                             | 8.48%                               | 548                                      | 173                            |  |

<sup>a</sup> Experimental absorption maxima.

<sup>b</sup> Experimental emission maxima.

<sup>c</sup> Stokes shift.

<sup>d</sup> The fluorescence quantum yields.

## 11. Effects of different solvent systems on the fluorescence properties of CPBI<sub>n</sub>

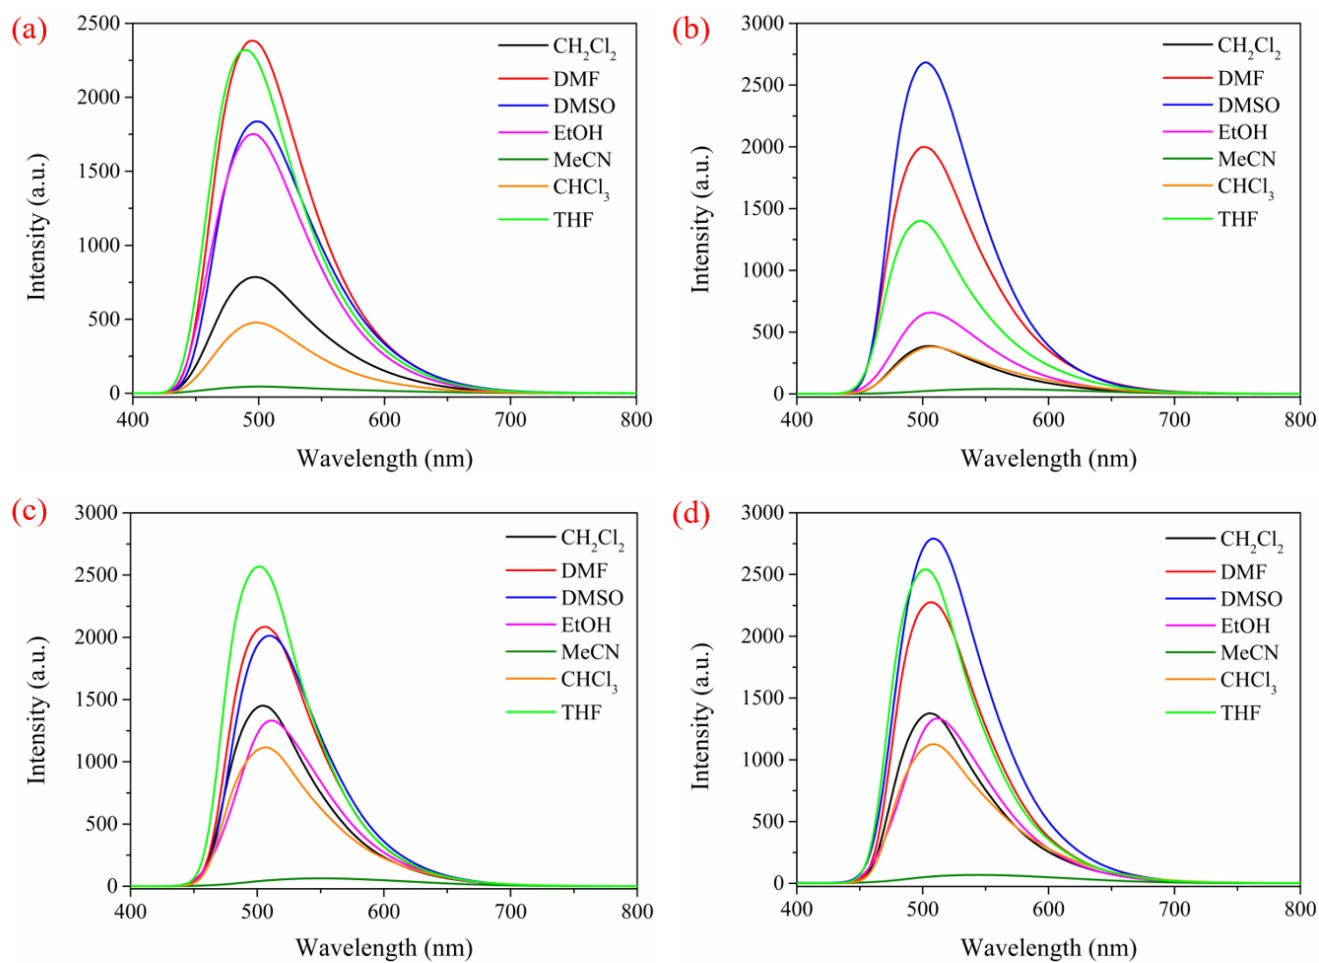

**Figure S13.** Fluorescence emission spectra in different polar solvents ( $\lambda_{\text{ex}} = 375$  nm) of **CPBI<sub>1</sub>** (a), **CPBI<sub>2</sub>** (b), **CPBI<sub>3</sub>** (c) and **CPBI<sub>4</sub>** (d).

## 12. Effects of different water content on the fluorescence properties of CPBI<sub>n</sub>

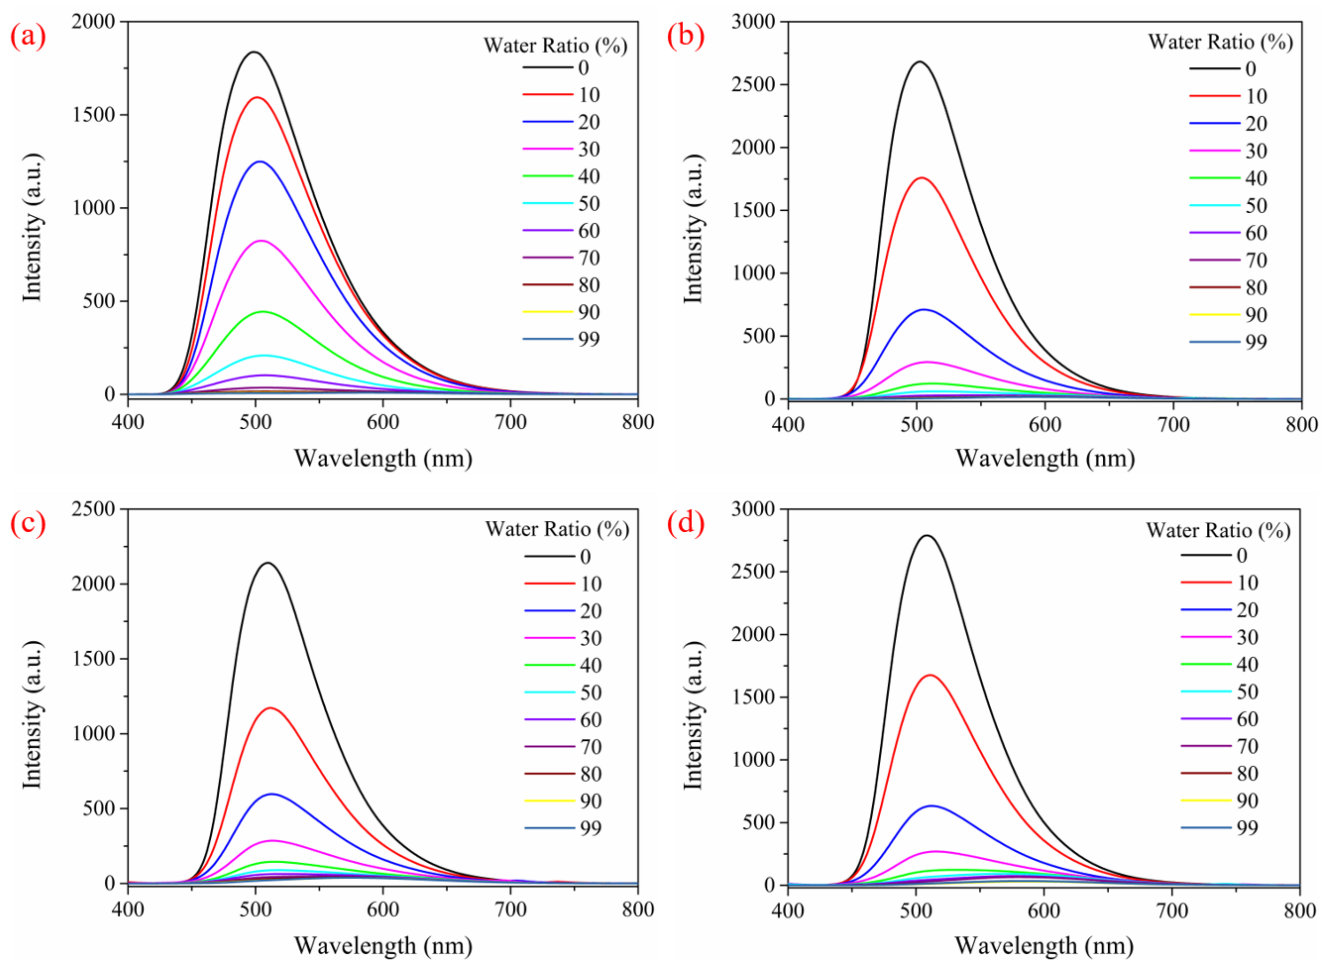

**Figure S14.** Fluorescence emission spectra in DMSO solutions (1 mg/15 mL) with different water content as DMSO/H<sub>2</sub>O (v/v) of CPBI<sub>1</sub> (a), CPBI<sub>2</sub> (b), CPBI<sub>3</sub> (c) and CPBI<sub>4</sub> (d),  $\lambda_{\text{ex}} = 375$  nm.

### 13. The competitive experiments of CPBI<sub>2</sub> for Cu<sup>2+</sup> or Zn<sup>2+</sup>

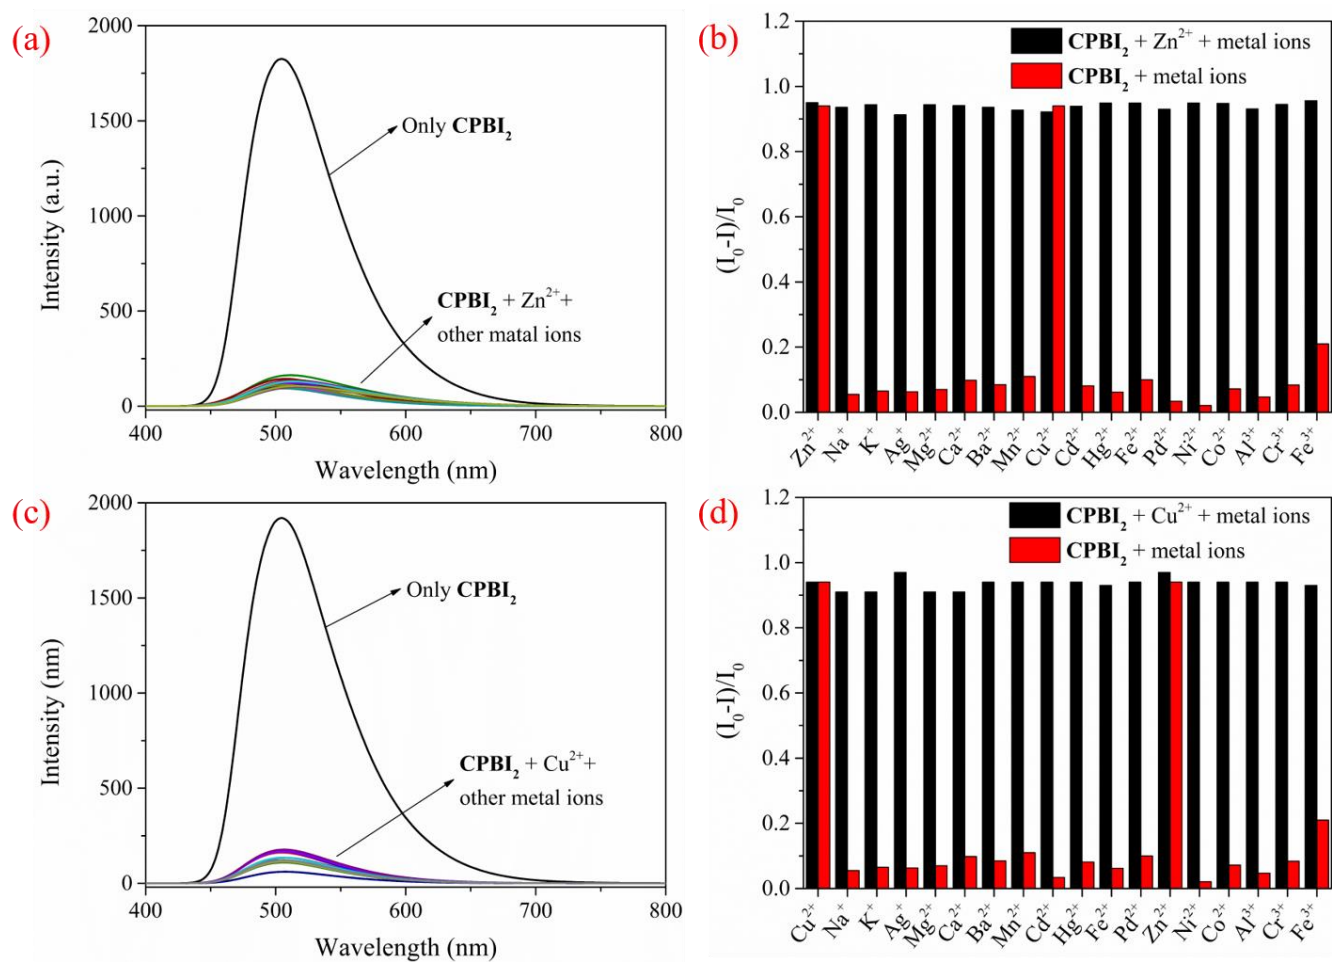

**Figure S15.** Fluorescence emission spectra of sensor **CPBI<sub>2</sub>** solution (1 mg/15 mL in DMSO/H<sub>2</sub>O, v/v, 9/1) with Zn<sup>2+</sup> (100  $\mu$ M) and other metal ions (100  $\mu$ M) (a) and comparison of fluorescence quenching rate (b), fluorescence emission spectra of Cu<sup>2+</sup> (100  $\mu$ M) and other metal ions (c) and comparison of fluorescence quenching rate (d),  $\lambda_{ex} = 375$  nm.

## 14. The selective experiments of CPBI<sub>1</sub> towards metal ions

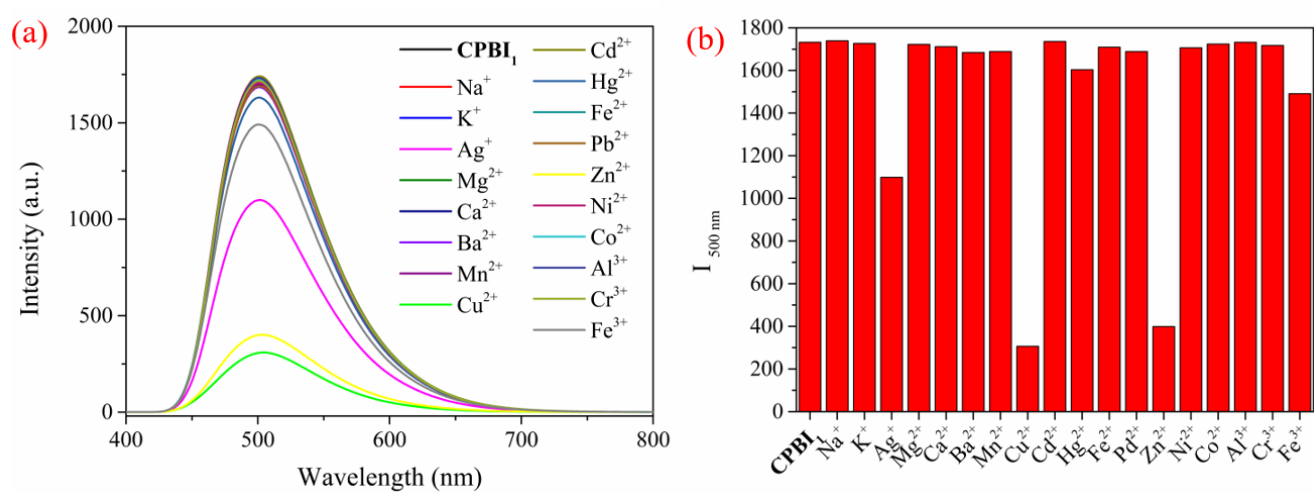

**Figure S16.** The fluorescence selectivity study of different metal ions (100  $\mu$ M) in CPBI<sub>1</sub> (1 mg/15 mL in DMSO/H<sub>2</sub>O, v/v, 9/1) solution (a), the influence of adding different metal ions (100  $\mu$ M) on CPBI<sub>1</sub> fluorescence intensity at 500 nm (b),  $\lambda_{\text{ex}} = 375$  nm.

## 15. The competitive experiments of CPBI<sub>1</sub> for Cu<sup>2+</sup> or Zn<sup>2+</sup>

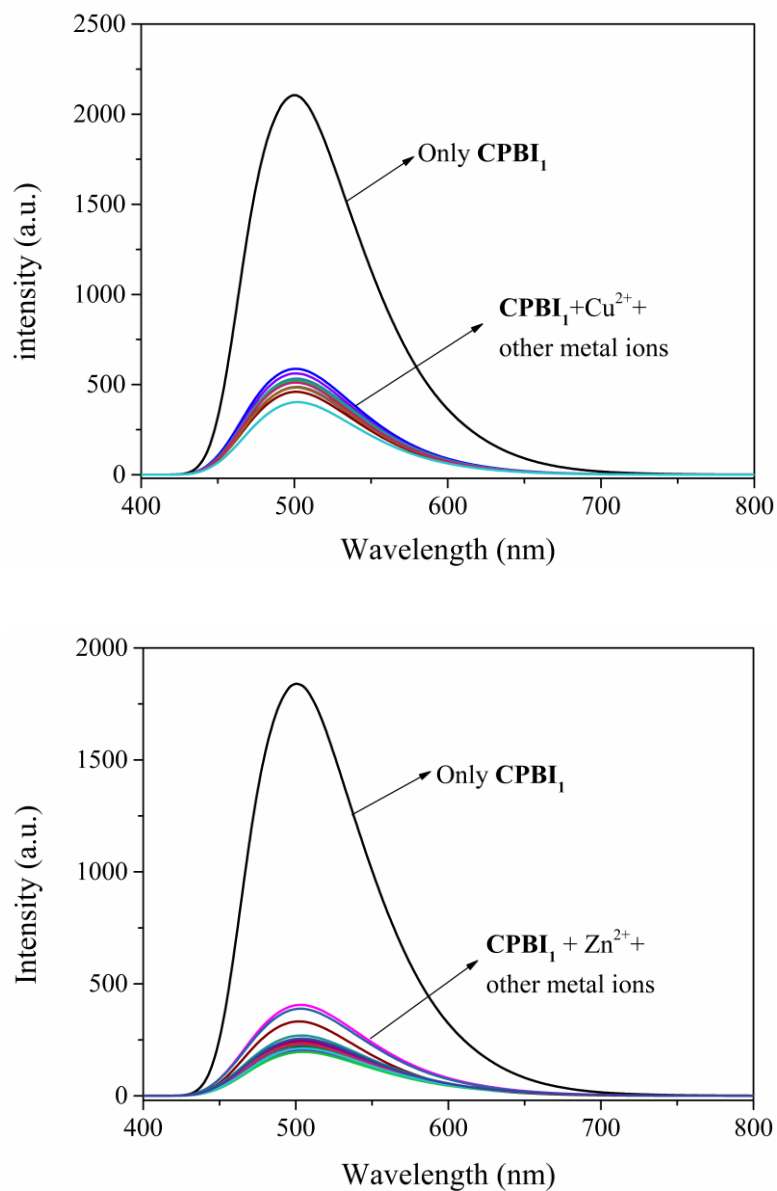

**Figure S17.** Fluorescence emission spectra of sensor **CPBI<sub>1</sub>** solution (1 mg/15 mL in DMSO/H<sub>2</sub>O, v/v, 9/1) with Cu<sup>2+</sup> (100 μM) and other metal ions (100 μM) (the upper), fluorescence emission spectra of Zn<sup>2+</sup> (100 μM) and other metal ions (100 μM) (the lower),  $\lambda_{\text{ex}} = 375$  nm.



## 16. Fluorescent titration and detection limit of CPBI<sub>1</sub> for Cu<sup>2+</sup>

Based on the fluorescence titration data of **CPBI<sub>1</sub>** and Cu<sup>2+</sup> (**Figure S18**), the LOD of **CPBI<sub>1</sub>** for Cu<sup>2+</sup> is obtained as  $8.2 \times 10^{-9}$  M according to the LOD calculation formula "LOD =  $3\delta/K$ ".

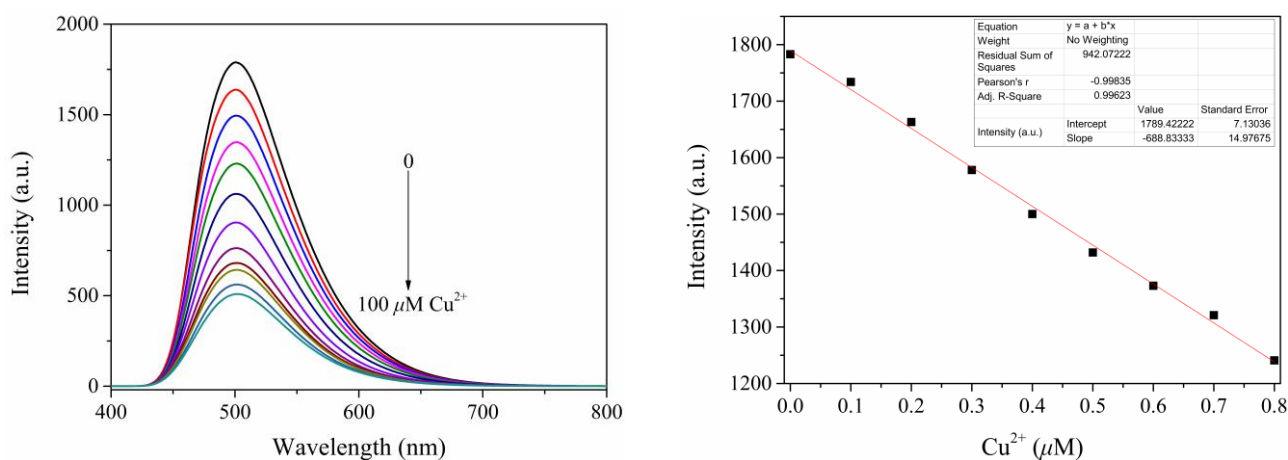

**Figure S18.** Fluorescence emission spectra of **CPBI<sub>1</sub>** (1 mg/15 mL in DMSO/H<sub>2</sub>O, v/v, 9/1) solution with different concentrations of Cu<sup>2+</sup> and the linear relationship between **CPBI<sub>1</sub>** and low concentrations of Cu<sup>2+</sup>,  $\lambda_{\text{ex}} = 375$  nm.

Compared with Cu<sup>2+</sup> sensors reported recently, **CPBI<sub>1</sub>** can sensitively detect Cu<sup>2+</sup> (more comparison can be seen in the following **Table S5** in this **SM**).

## 17. Fluorescent titration and detection limit of CPBI<sub>1</sub> for Zn<sup>2+</sup>

Based on the fluorescence titration data of **CPBI<sub>1</sub>** and Zn<sup>2+</sup> (**Figure S19**), the LOD of **CPBI<sub>1</sub>** for Zn<sup>2+</sup> is obtained as  $8.51 \times 10^{-9}$  M according to the LOD calculation formula "LOD =  $3\delta/K$ ".

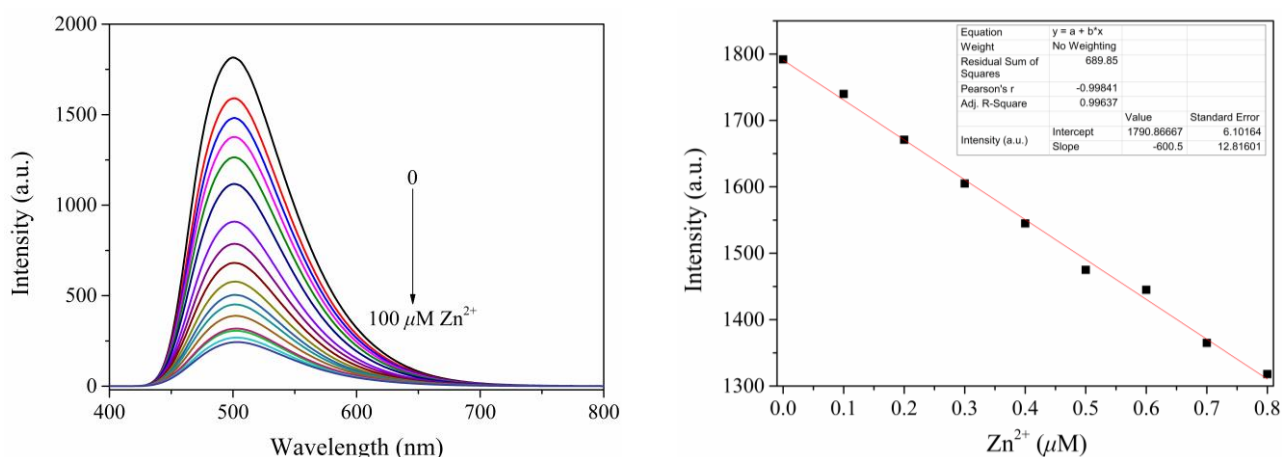

**Figure S19.** Fluorescence emission spectra of **CPBI<sub>1</sub>** (1 mg/15 mL in DMSO/H<sub>2</sub>O, v/v, 9/1) solution with different concentrations of Zn<sup>2+</sup> and the linear relationship between **CPBI<sub>1</sub>** and low concentrations of Zn<sup>2+</sup>,  $\lambda_{\text{ex}} = 375$  nm.

Compared with Zn<sup>2+</sup> sensors reported recently, **CPBI<sub>1</sub>** can sensitively detect Zn<sup>2+</sup> (more comparison can be seen in the following **Table S6** in this **SM**).

## 18. The selective experiments of CPBI<sub>3</sub> towards metal ions

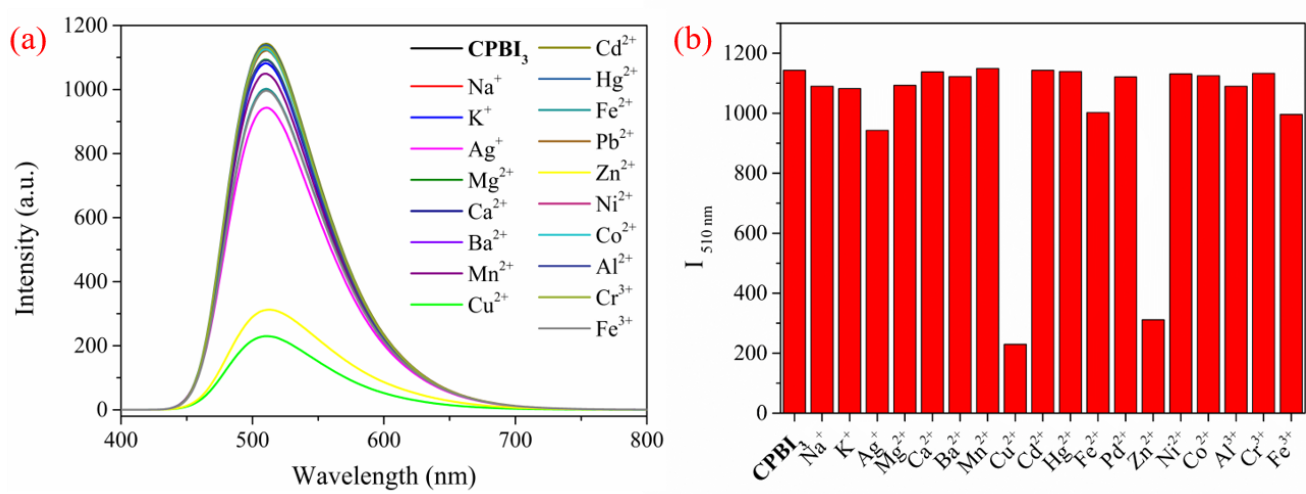

**Figure S20.** The fluorescence selectivity study of different metal ions (100  $\mu$ M) in CPBI<sub>3</sub> (1 mg/15 mL in DMSO/H<sub>2</sub>O, v/v, 9/1) solution (a), the influence of adding different metal ions (100  $\mu$ M) on CPBI<sub>3</sub> fluorescence intensity at 510 nm (b),  $\lambda_{\text{ex}} = 375$  nm.

## 19. The competitive experiments of CPBI<sub>3</sub> for Cu<sup>2+</sup> or Zn<sup>2+</sup>

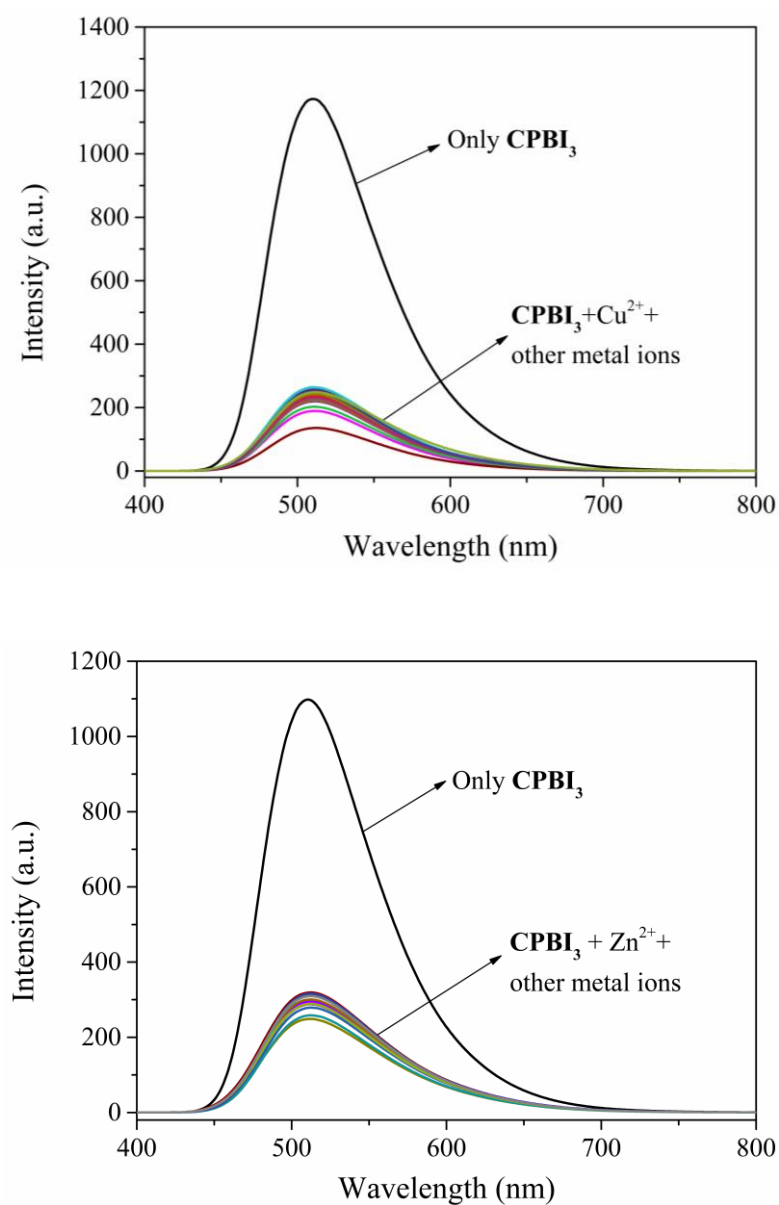

**Figure S21.** Fluorescence emission spectra of sensor **CPBI<sub>3</sub>** solution (1 mg/15 mL in DMSO/H<sub>2</sub>O, v/v, 9/1) with Cu<sup>2+</sup> (100 μM) and other metal ions (100 μM) (the upper), fluorescence emission spectra of Zn<sup>2+</sup> (100 μM) and other metal ions (100 μM) (the lower),  $\lambda_{\text{ex}} = 375$  nm.

## 20. Fluorescent titration and detection limit of CPBI<sub>3</sub> for Cu<sup>2+</sup>

Based on the fluorescence titration data of **CPBI<sub>3</sub>** and Cu<sup>2+</sup> (**Figure S22**), the LOD of **CPBI<sub>3</sub>** for Cu<sup>2+</sup> is obtained as  $4.42 \times 10^{-9}$  M according to the LOD calculation formula "LOD =  $3\delta/K$ ".

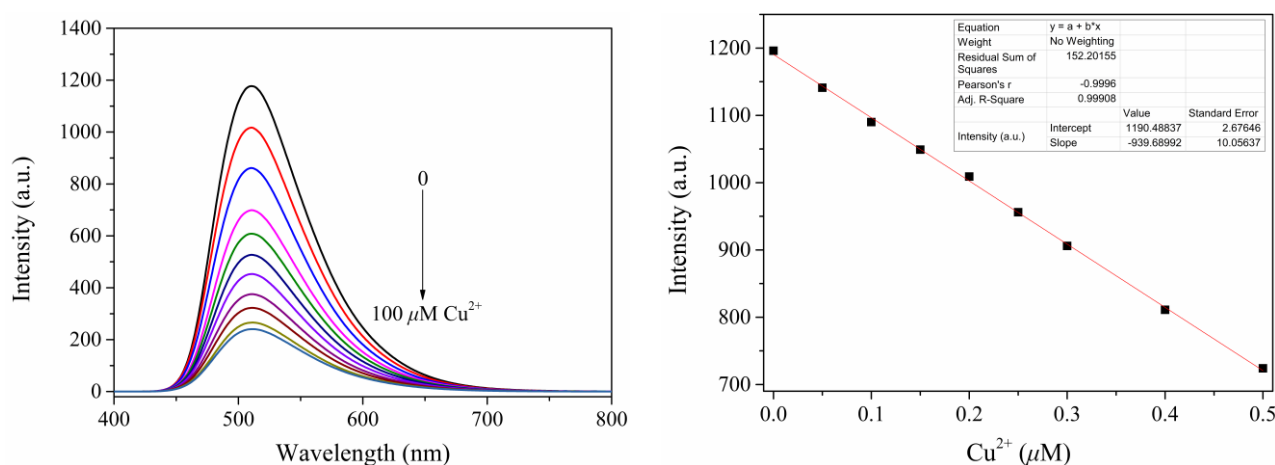

**Figure S22.** Fluorescence emission spectra of **CPBI<sub>3</sub>** (1 mg/15 mL in DMSO/H<sub>2</sub>O, v/v, 9/1) solution with different concentrations of Cu<sup>2+</sup> and the linear relationship between **CPBI<sub>3</sub>** and low concentrations of Cu<sup>2+</sup>, λ<sub>ex</sub> = 375 nm.

Compared with Cu<sup>2+</sup> sensors reported recently, **CPBI<sub>3</sub>** can sensitively detect Cu<sup>2+</sup> (more comparison can be seen in the following **Table S5** in this **SM**).

## 21. Fluorescent titration and detection limit of CPBI<sub>3</sub> for Zn<sup>2+</sup>

Based on the fluorescence titration data of **CPBI<sub>3</sub>** and Zn<sup>2+</sup> (**Figure S23**), the LOD of **CPBI<sub>3</sub>** for Zn<sup>2+</sup> is obtained as  $3.68 \times 10^{-9}$  M according to the LOD calculation formula "LOD =  $3\delta/K$ ".

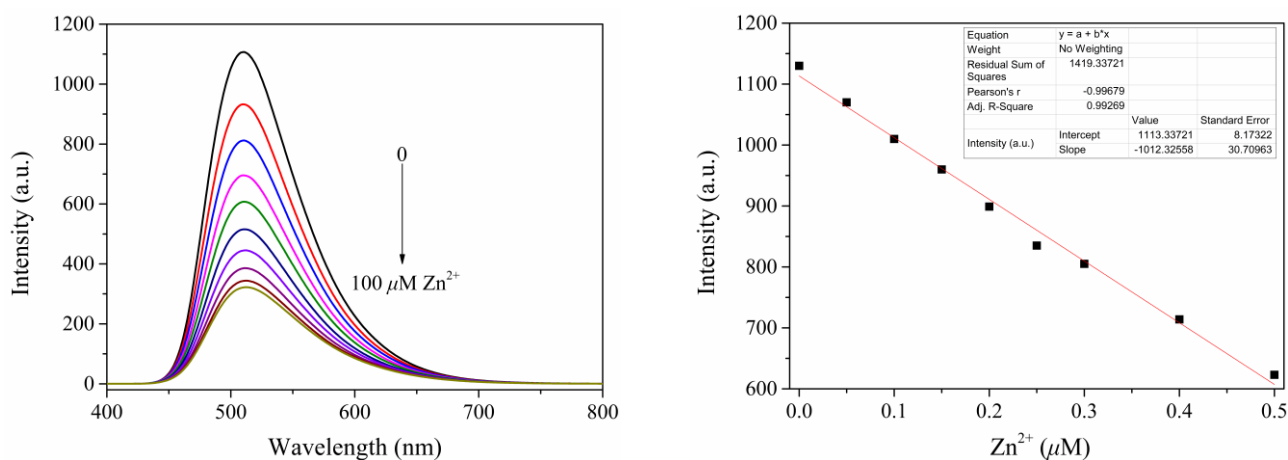

**Figure S23.** Fluorescence emission spectra of **CPBI<sub>3</sub>** (1 mg/15 mL in DMSO/H<sub>2</sub>O, v/v, 9/1) solution with different concentrations of Zn<sup>2+</sup> and the linear relationship between **CPBI<sub>3</sub>** and low concentrations of Zn<sup>2+</sup>, λ<sub>ex</sub> = 375 nm.

Compared with Zn<sup>2+</sup> sensors reported recently, **CPBI<sub>3</sub>** can sensitively detect Zn<sup>2+</sup> (more comparison can be seen in the following **Table S6** in this **SM**).

## 22. The selective experiments of CPBI<sub>4</sub> towards metal ions

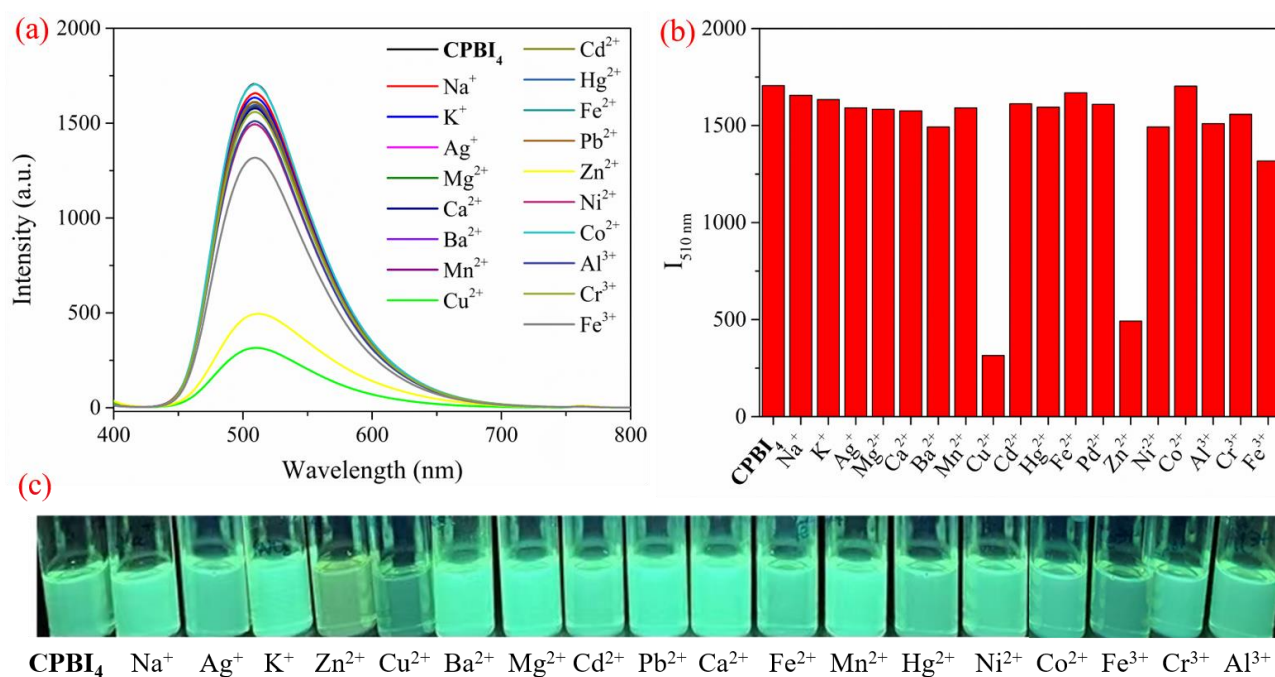

**Figure S24.** The fluorescence selectivity study of different metal ions (100  $\mu\text{M}$ ) in CPBI<sub>4</sub> (1 mg/15 mL in DMSO/H<sub>2</sub>O, v/v, 9/1) solution,  $\lambda_{\text{ex}} = 375\text{ nm}$  (a), the influence of adding different metal ions (100  $\mu\text{M}$ ) on CPBI<sub>4</sub> fluorescence intensity at 510 nm (b) and the color change of the solution (c).

## 23. The competitive experiments of CPBI<sub>4</sub> for Cu<sup>2+</sup> or Zn<sup>2+</sup>

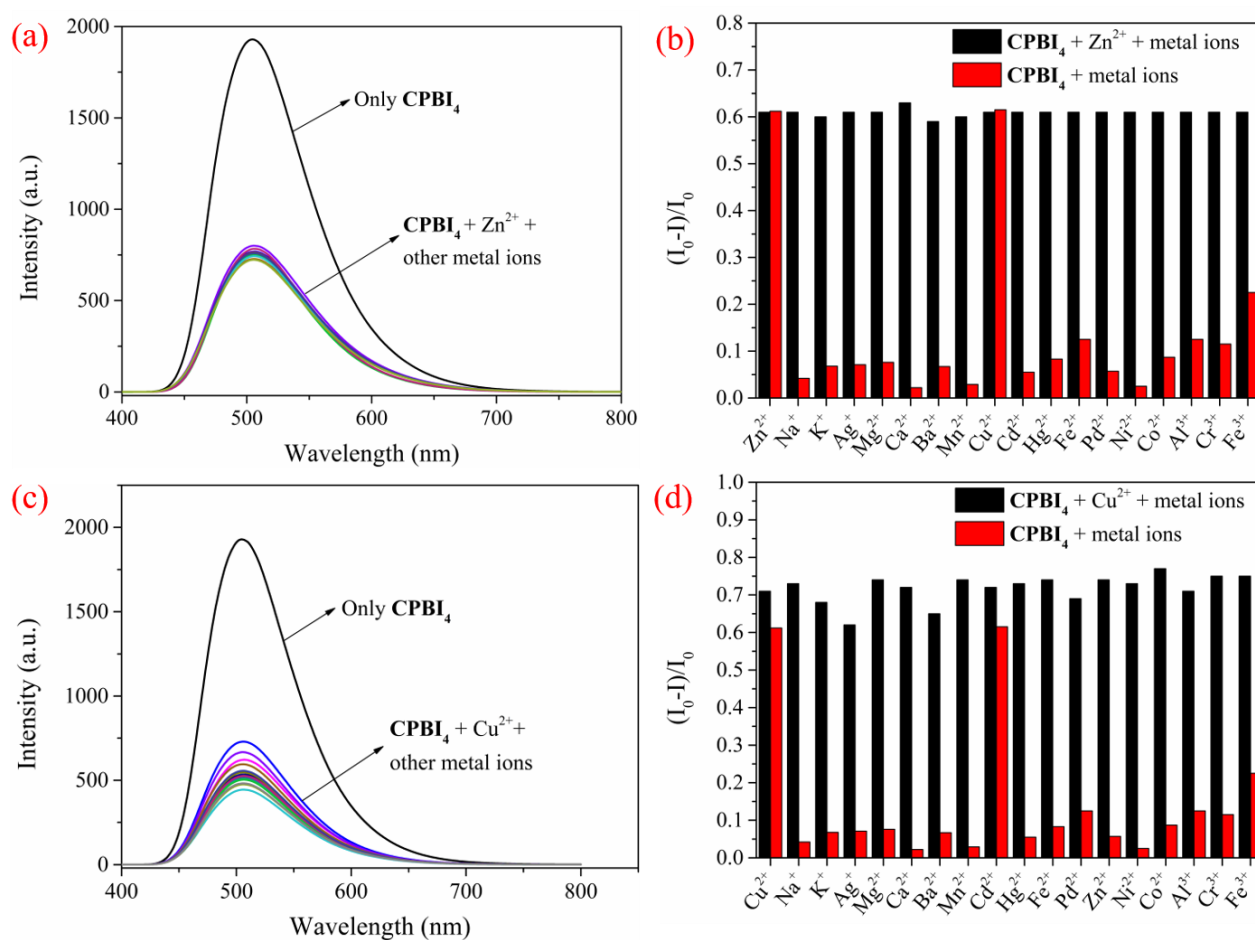

**Figure S25.** Fluorescence emission spectra of sensor **CPBI<sub>4</sub>** solution (1 mg/15 mL in DMSO/H<sub>2</sub>O, v/v, 9/1) with Zn<sup>2+</sup> (100 μM) and other metal ions (100 μM) (a) and comparison of fluorescence quenching rate (b), fluorescence emission spectra of Cu<sup>2+</sup> (100 μM) and other metal ions (100 μM) (c) and comparison of fluorescence quenching rate (d),  $\lambda_{\text{ex}} = 375$  nm.



## 24. Fluorescent titration and detection limit of CPBI<sub>4</sub> for Cu<sup>2+</sup>

Based on the fluorescence titration data of **CPBI<sub>4</sub>** and Cu<sup>2+</sup> (**Figure S26**), the LOD of **CPBI<sub>4</sub>** for Cu<sup>2+</sup> is obtained as  $2.2 \times 10^{-9}$  M according to the LOD calculation formula "LOD =  $3\delta/K$ ".

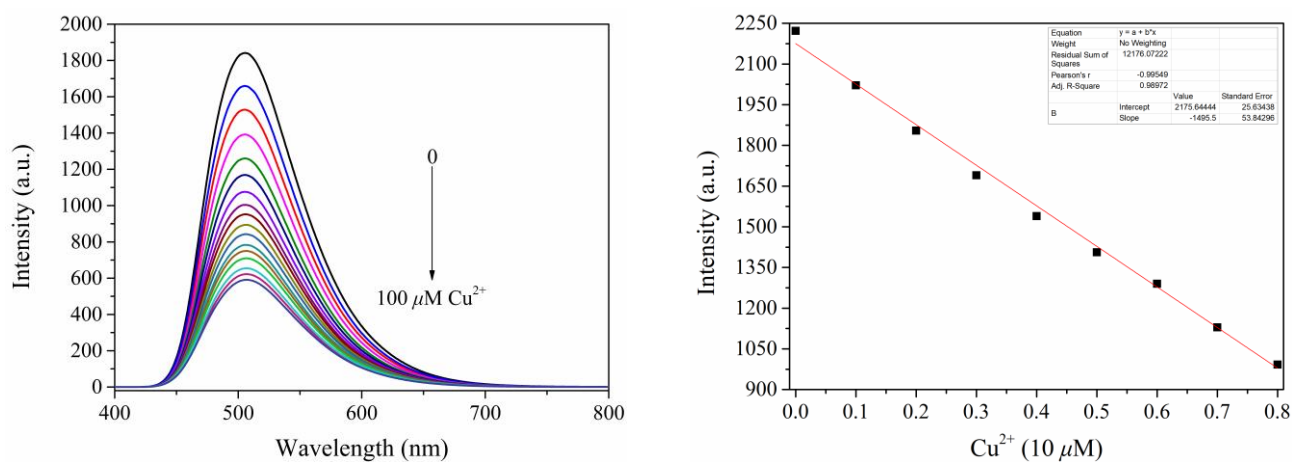

**Figure S26.** Fluorescence emission spectra of **CPBI<sub>4</sub>** (1 mg/15 mL in DMSO/H<sub>2</sub>O, v/v, 9/1) solution with different concentrations of Cu<sup>2+</sup> and the linear relationship between **CPBI<sub>4</sub>** and low concentrations of Cu<sup>2+</sup>, λ<sub>ex</sub> = 375 nm.

Compared with Cu<sup>2+</sup> sensors reported recently, **CPBI<sub>4</sub>** can sensitively detect Cu<sup>2+</sup> (more comparison can be seen in the following **Table S5** in this **SM**).

## 25. Fluorescent titration and detection limit of CPBI<sub>4</sub> for Zn<sup>2+</sup>

Based on the fluorescence titration data of **CPBI<sub>4</sub>** and Zn<sup>2+</sup> (**Figure S27**), the LOD of **CPBI<sub>4</sub>** for Zn<sup>2+</sup> is obtained as  $1.93 \times 10^{-9}$  M according to the LOD calculation formula "LOD =  $3\delta/K$ ".

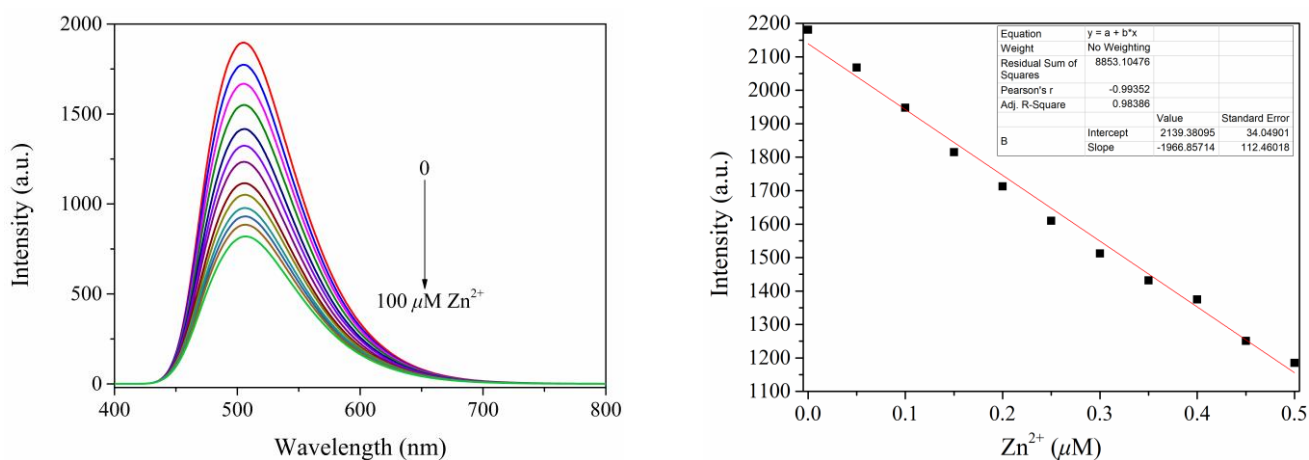

**Figure S27.** Fluorescence emission spectra of **CPBI<sub>4</sub>** (1 mg/15 mL in DMSO/H<sub>2</sub>O, v/v, 9/1) solution with different concentrations of Zn<sup>2+</sup> and the linear relationship between **CPBI<sub>4</sub>** and low concentrations of Zn<sup>2+</sup>, λ<sub>ex</sub> = 375 nm.

Compared with Zn<sup>2+</sup> sensors reported recently, **CPBI<sub>4</sub>** can sensitively detect Zn<sup>2+</sup> (more comparison can be seen in the following **Table S6** in this **SM**).

## 26. The plots of CPBI<sub>4</sub> vs concentration of Cu<sup>2+</sup> and Zn<sup>2+</sup>

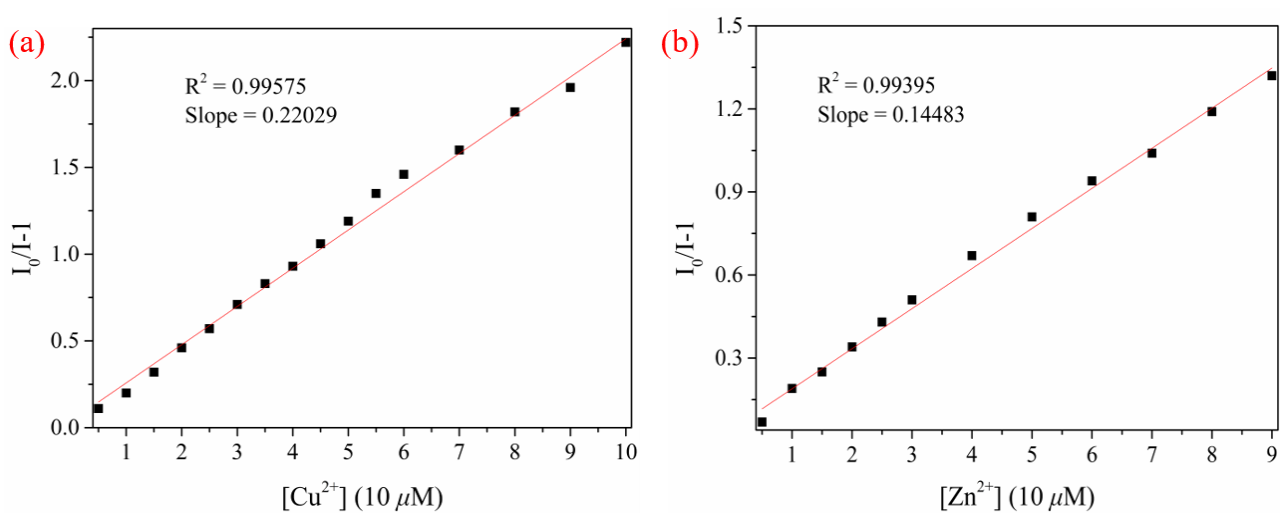

**Figure S28.** Stern-Volmer diagram of the interaction of sensors **CPBI<sub>4</sub>** with Cu<sup>2+</sup> (a) and Zn<sup>2+</sup> (b) (the illustration shows the Stern-Volmer linear diagram at low concentrations).

## 27. Comparison of detection limits of $\text{Cu}^{2+}$ and $\text{Zn}^{2+}$ by serial $\text{CPBI}_n$

**Table S4.** Comparison of LOD when the sensor  $\text{CPBI}_n$  detects  $\text{Cu}^{2+}$  and  $\text{Zn}^{2+}$ .

| Sensor                  | LOD for $\text{Cu}^{2+}$        | LOD for $\text{Zn}^{2+}$        |
|-------------------------|---------------------------------|---------------------------------|
| <b>CPBI<sub>1</sub></b> | $8.20 \times 10^{-9} \text{ M}$ | $8.51 \times 10^{-9} \text{ M}$ |
| <b>CPBI<sub>2</sub></b> | $5.98 \times 10^{-9} \text{ M}$ | $6.02 \times 10^{-9} \text{ M}$ |
| <b>CPBI<sub>3</sub></b> | $4.42 \times 10^{-9} \text{ M}$ | $3.68 \times 10^{-9} \text{ M}$ |
| <b>CPBI<sub>4</sub></b> | $2.21 \times 10^{-9} \text{ M}$ | $1.93 \times 10^{-9} \text{ M}$ |

## 28. The changes of FT-IR spectra and morphology before or after the combination with analytes

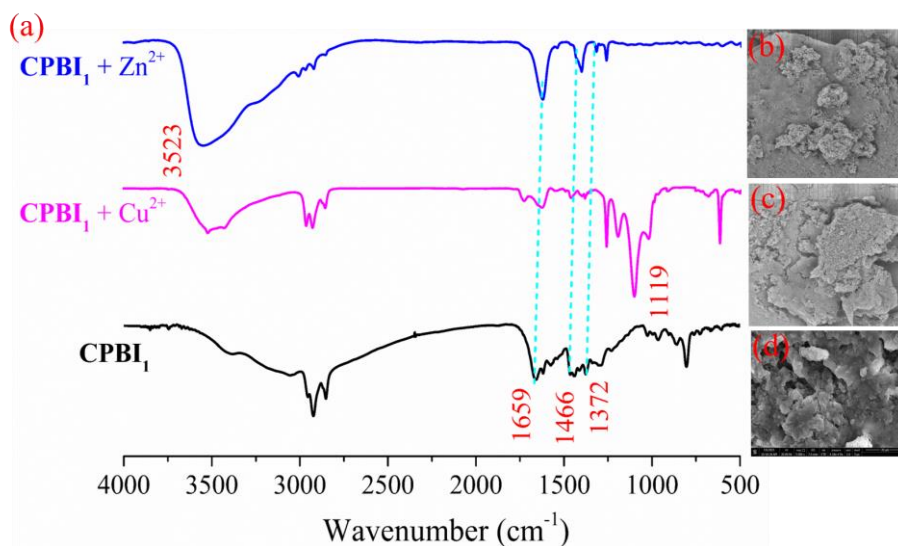

**Figure S29.** FT-IR spectra (a), SEM images of **CPBI<sub>1</sub>** before and after the addition of Cu<sup>2+</sup> or Zn<sup>2+</sup> (b: **CPBI<sub>1</sub>** + Zn<sup>2+</sup>; c: **CPBI<sub>1</sub>** + Cu<sup>2+</sup>; d: **CPBI<sub>1</sub>**).

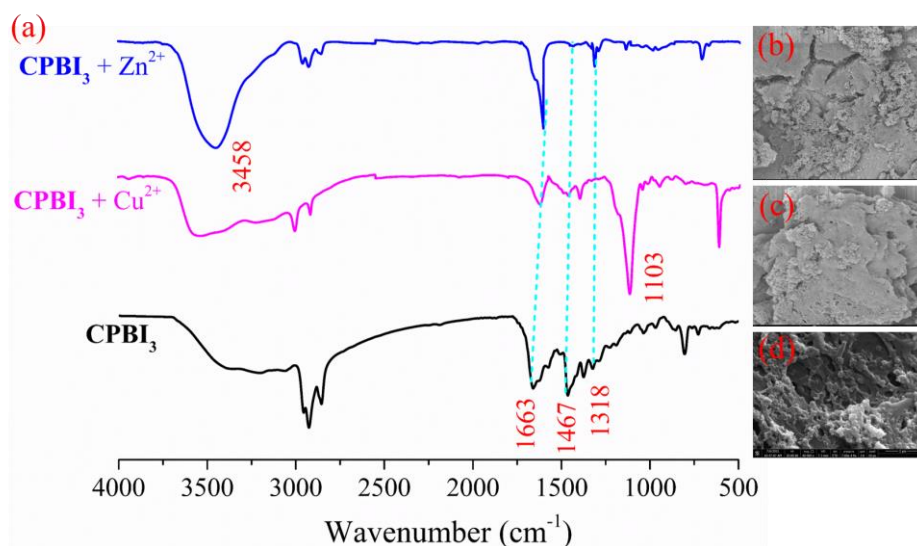

**Figure S30.** FT-IR spectra (a), SEM images of **CPBI<sub>3</sub>** before and after the addition of Cu<sup>2+</sup> or Zn<sup>2+</sup> (b: **CPBI<sub>3</sub>** + Zn<sup>2+</sup>; c: **CPBI<sub>3</sub>** + Cu<sup>2+</sup>; d: **CPBI<sub>3</sub>**).

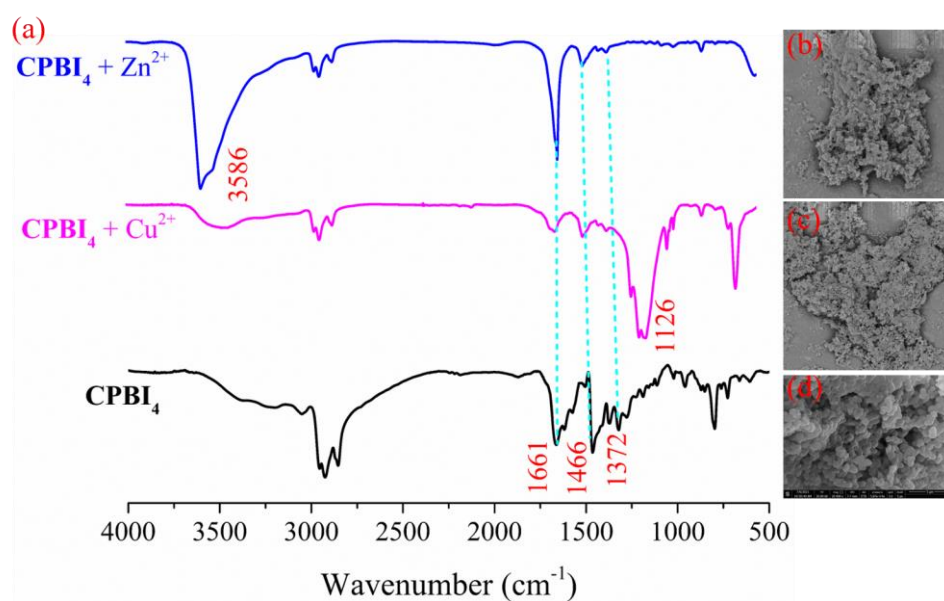

**Figure S31.** FT-IR spectra (a), SEM images of **CPBI<sub>4</sub>** before and after the addition of Cu<sup>2+</sup> or Zn<sup>2+</sup> (b: **CPBI<sub>4</sub>** + Zn<sup>2+</sup>; c: **CPBI<sub>4</sub>** + Cu<sup>2+</sup>; d: **CPBI<sub>4</sub>**).

## 29. TCSPC plots for CPBI<sub>2</sub> and CPBI<sub>4</sub> interacted with Cu<sup>2+</sup> and Zn<sup>2+</sup>

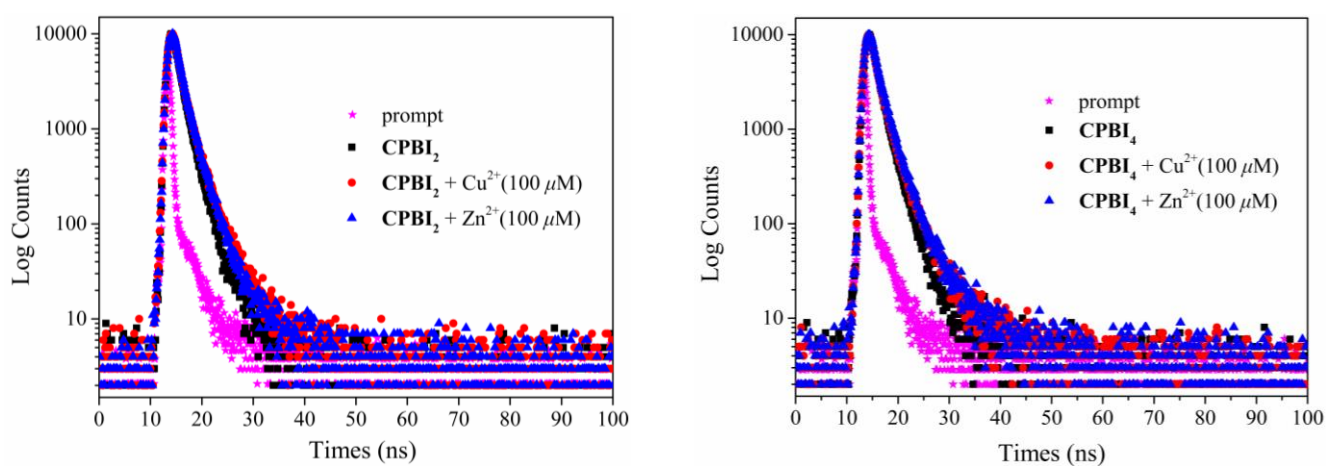

**Figure S32.** Time-correlated single photon counting (TCSPC) plot for **CPBI<sub>2</sub>** (left) and **CPBI<sub>4</sub>** (right) interacted with Cu<sup>2+</sup> and Zn<sup>2+</sup> ( $\lambda_{\text{ex}} = 375$  nm,  $\lambda_{\text{em}} = 504$  nm for **CPBI<sub>2</sub>** and  $\lambda_{\text{em}} = 510$  nm for **CPBI<sub>4</sub>**, respectively).

### 30. Comparison of CPBI<sub>n</sub> with Cu<sup>2+</sup> and Zn<sup>2+</sup> probes available in the literature

**Table S5.** The comparison of probe CPBI<sub>n</sub> with the reported Cu<sup>2+</sup> probes in solution.

| No. | Probe type                                                                              | Solvent                                                 | Detection limit         | Signal types             | Ref. |
|-----|-----------------------------------------------------------------------------------------|---------------------------------------------------------|-------------------------|--------------------------|------|
| 1   | In-MOF based dual-responsive fluorescence probe                                         | Aqueous solution                                        | $6.06 \times 10^{-8}$ M | Turn-off                 | [14] |
| 2   | Rhodamine B integrated ZIF-8                                                            | Aqueous solution                                        | $1.91 \times 10^{-7}$ M | Fluorescence ratiometric | [15] |
| 3   | Possessing an anthracene scaffold as a fluorophore and ferrocene as a redox active unit | Aqueous media                                           | $3.9 \times 10^{-8}$ M  | Turn-off                 | [16] |
| 4   | Fe <sub>3</sub> O <sub>4</sub> @SiO <sub>2</sub> -NH <sub>2</sub> /CQDs                 | Aqueous solution                                        | $1.6 \times 10^{-7}$ M  | Turn-off                 | [12] |
| 5   | A dicyanomethylene-4H-pyran-based                                                       | PBS solution (10 mM, pH = 7.4, 50% DMSO)                | $2.54 \times 10^{-8}$ M | Turn-on                  | [17] |
| 6   | N-acetyl-L-cysteines (NALC) (NALC-CdS QDs)                                              | Aqueous solution                                        | $4.8 \times 10^{-7}$ M  | Turn-off                 | [18] |
| 7   | Dual-functional peptide-based probe                                                     | Aqueous solution                                        | $7.67 \times 10^{-8}$ M | Turn off                 | [19] |
| 8   | 4-Hydroxyhypoxidone                                                                     | Aqueous solution                                        | $4.0 \times 10^{-5}$ M  | Turn-on                  | [10] |
| 9   | Dibenzimidazole-based                                                                   | Aqueous solution                                        | $9.4 \times 10^{-8}$ M  | Turn off                 | [21] |
| 10  | BODIPY derivatives                                                                      | MeOH                                                    | $1.0 \times 10^{-7}$ M  | Turn-off                 | [22] |
| 11  | Carbon dots                                                                             | EtOH /PBS buffer (1:4, V/V, 10 mM, pH = 7.4, 37 °C)     | $2.89 \times 10^{-9}$ M | Turn-off                 | [23] |
| 12  | A hemicyanine scaffold as the fluorophore                                               | PBS buffer (1% DMSO, pH = 7.4)                          | $4.0 \times 10^{-9}$ M  | Turn-on                  | [24] |
| 13  | Carbazole-based                                                                         | Aqueous solution                                        | $7.80 \times 10^{-6}$ M | Turn-off                 | [25] |
| 14  | Aminophenylbenzimidazole derivative                                                     | Aqueous HEPES buffer (10 mM, pH = 7.4)                  | $2.3 \times 10^{-8}$ M  | Ratiometric              | [26] |
| 15  | Pyrene-based                                                                            | DMSO/H <sub>2</sub> O (2:8 V/V), 50 mM HEPES, pH = 7.4) | $7.3 \times 10^{-10}$ M | Turn-off                 | [27] |



|                  |                                                                                                                |                                          |                         |             |      |
|------------------|----------------------------------------------------------------------------------------------------------------|------------------------------------------|-------------------------|-------------|------|
| 16               | A coumarin-containing Schiff base                                                                              | THF/H <sub>2</sub> O (1/99, V/V)         | $3.6 \times 10^{-7}$ M  | Turn-off    | [28] |
| 17               | Carbon nitride@gold nanoclusters (WS-GCN@AuNCs) nanocomposite                                                  | Aqueous solution                         | $3.63 \times 10^{-9}$ M | Turn-off    | [13] |
| 18               | Oevinyl protected hydroxyl benzaldehyde                                                                        | CH <sub>3</sub> CN-PBS buffer (3:7, V/V) | $6.7 \times 10^{-7}$ M  | Ratiometric | [29] |
| 19               | A dansyl derivative                                                                                            | HEPES buffer solution (10 mM, pH = 7.4)  | $2.9 \times 10^{-7}$ M  | Turn-off    | [30] |
| 20               | [1,2-Phenylenediamine-2,6-pyridinedialdehyde macrocyclic Schiff base] (BP-MSB) based on 2,6-pyridinedialdehyde | Aqueous solution                         | $8.3 \times 10^{-10}$ M | Turn-off    | [31] |
| <i>This work</i> | <b>CPBI<sub>1</sub></b>                                                                                        | DMSO/H <sub>2</sub> O (9/1, V/V)         | $8.20 \times 10^{-9}$ M | Turn-off    |      |
|                  | <b>CPBI<sub>2</sub></b>                                                                                        | DMSO/H <sub>2</sub> O (9/1, V/V)         | $5.98 \times 10^{-9}$ M | Turn-off    |      |
|                  | <b>CPBI<sub>3</sub></b>                                                                                        | DMSO/H <sub>2</sub> O (9/1, V/V)         | $4.42 \times 10^{-9}$ M | Turn-off    |      |
|                  | <b>CPBI<sub>4</sub></b>                                                                                        | DMSO/H <sub>2</sub> O (9/1, V/V)         | $2.21 \times 10^{-9}$ M | Turn-off    |      |

**Table S6.** The comparison of probe **CPBI<sub>n</sub>** with the reported Zn<sup>2+</sup> probes in solution.

| No. | Probe type                                                                                                                            | Solvent                                          | Detection limit         | Signal types | Ref. |
|-----|---------------------------------------------------------------------------------------------------------------------------------------|--------------------------------------------------|-------------------------|--------------|------|
| 1   | Quinoline-based chemosensor                                                                                                           | Aqueous solution                                 | $6.0 \times 10^{-7}$ M  | Turn-on      | [18] |
| 2   | Schiff base                                                                                                                           | H <sub>2</sub> O/CH <sub>3</sub> OH (80/20, V/V) | $3.84 \times 10^{-8}$ M | Turn-on      | [32] |
| 3   | 5,5''-Diaryl-2,2':6',2''-terpyridines                                                                                                 | CH <sub>3</sub> CN ( $10^{-5}$ M)                | $1.0 \times 10^{-10}$ M | Turn-on      | [33] |
| 4   | 7,8-Benzochromone-3-carb aldehyde(fluorescein)-hydrazone                                                                              | EtOH/H <sub>2</sub> O (9/1, V/V)                 | $3.4 \times 10^{-7}$ M  | Turn-on      | [34] |
| 5   | Anthracene possessing amide functionality                                                                                             | CH <sub>3</sub> CN                               | $3.03 \times 10^{-6}$ M | Turn-on      | [35] |
| 6   | Based rhodamine 6G condensed isophorone moiety (RHI)                                                                                  | EtOH/H <sub>2</sub> O (8/2, V/V)                 | $8.22 \times 10^{-8}$ M | Turn-on      | [36] |
| 7   | (E)-1-(6-(4-(2-(2-(2-methoxyethoxy)ethoxy)ethoxy)-3,5-dimethylstyryl)quinolin-2-yl)-N,N-bis(pyridin-2-ylmethyl)methanamine (TEO-MPVQ) | Methanol/Buffer (1/9, V/V)                       | $2.5 \times 10^{-8}$ M  | Turn-on      | [37] |
| 8   | Naphthalimide-derived                                                                                                                 | HEPES                                            | $1.0 \times 10^{-5}$ M  | Turn-on      | [38] |
| 9   | A star-shaped Schiff base                                                                                                             | Aqueous solution                                 | $2.4 \times 10^{-6}$ M  | Turn-on      | [39] |
| 10  | 8-Amidoquinoline Derivatives                                                                                                          | Aqueous solution                                 | $3.36 \times 10^{-8}$ M | Turn-on      | [40] |
| 11  | Naphthalene derivative                                                                                                                | EtOH/H <sub>2</sub> O (9/1, V/V, pH = 7.4)       | $3.17 \times 10^{-9}$ M | Turn-on      | [41] |
| 12  | A bisphenol based                                                                                                                     | DMSO/H <sub>2</sub> O (1/9, V/V)                 | $2.8 \times 10^{-10}$ M | Turn-on      | [42] |
| 13  | Formylcoumarin and aminoquinoline moieties                                                                                            | MeOH-H <sub>2</sub> O (4/1, V/V)                 | $3.75 \times 10^{-8}$ M | Turn-on      | [43] |
| 14  | A coumarin-based                                                                                                                      | PBS (pH = 7.24, 60% DMF)                         | $9.5 \times 10^{-7}$ M  | Turn-on      | [44] |
| 15  | Molecular brushes of poly(2-oxazoline)                                                                                                | Aqueous solution                                 | $8.9 \times 10^{-6}$ M  | Turn-on      | [45] |
| 16  | Anthracene-based                                                                                                                      | DMSO/H <sub>2</sub> O (3:1, V/V)                 | $3.6 \times 10^{-8}$ M  | Turn-on      | [46] |
| 17  | A novel salen derivative                                                                                                              | DMF                                              | $1.63 \times 10^{-8}$ M | Turn-on      | [47] |

|                  |                                                                                                                               |                                                         |                         |          |                      |
|------------------|-------------------------------------------------------------------------------------------------------------------------------|---------------------------------------------------------|-------------------------|----------|----------------------|
| 18               | Heterocyclic-fused naphthalimide fluorophore, and the zinc receptor, <i>N,N</i> -bis(2-pyridylmethyl)-ethylenediamine (BPEN). | Phosphate buffer solution                               | $4.0 \times 10^{-9}$ M  | Turn-on  | <a href="#">[54]</a> |
| 19               | Thiophen-based                                                                                                                | CH <sub>3</sub> CN                                      | $6.0 \times 10^{-7}$ M  | Turn-on  | <a href="#">[48]</a> |
| 20               | Benzothiazole as signal unit                                                                                                  | DMF/H <sub>2</sub> O (1/1, V/V, 0.01 M HEPES, pH = 6.0) | $1.27 \times 10^{-7}$ M | Turn-on  | <a href="#">[49]</a> |
| <i>This work</i> | <b>CPBI<sub>1</sub></b>                                                                                                       | DMSO/H <sub>2</sub> O (9/1, V/V)                        | $8.51 \times 10^{-9}$ M | Turn-off |                      |
|                  | <b>CPBI<sub>2</sub></b>                                                                                                       | DMSO/H <sub>2</sub> O (9/1, V/V)                        | $6.02 \times 10^{-9}$ M | Turn-off |                      |
|                  | <b>CPBI<sub>3</sub></b>                                                                                                       | DMSO/H <sub>2</sub> O (9/1, V/V)                        | $3.68 \times 10^{-9}$ M | Turn-off |                      |
|                  | <b>CPBI<sub>4</sub></b>                                                                                                       | DMSO/H <sub>2</sub> O (9/1, V/V)                        | $1.93 \times 10^{-9}$ M | Turn-off |                      |

## References

- [1] Huang, F.; Pingitore, A.T.; Benicewicz, B.C. Electrochemical hydrogen separation from reformat using high temperature polybenzimidazole (PBI) membranes: the role of chemistry. *ACS Sustainable Chem. Eng.* **2020**, *8*, 6234-6242.
- [2] Konovalova, A.; Stock, D.; Schroder, S.; Park, H.S.; Jang, J.H.; Kim, H.J.; Han, J.; Schroder, D.; Henkensmeier, D. Partially methylated polybenzimidazoles as coating for alkaline zinc anodes. *J. Membr. Sci.* **2020**, *610*, 118254.
- [3] Aili, D.; Yang, J.S.; Jankova, K.; Henkensmeier, D.; Li, Q.F. From polybenzimidazoles to polybenzimidazoliums and polybenzimidazolides. *J. Mater. Chem. A* **2020**, *8*, 12854-12886.
- [4] Hussaini, S.Y.; Haque, R.A.; Fatima, T.; Agha, T.M.; Majid, A.M.S.A.; Abdallah, H.H.; Razali, M.R. Nitrile functionalized silver(I) *N*-heterocyclic carbene complexes: DFT calculations and anti-tumor studies. *Transition Met. Chem.* **2018**, *43*, 301-312.
- [5] Shannon, M.S.; Hindman, M.S.; Danielsen, S.P.O.; Tedstone, J.M.; Gilmore, R.D.; Bara, J.E. Properties of alkyl benzimidazoles for CO<sub>2</sub> and SO<sub>2</sub> capture and comparisons to ionic liquids. *Sci. China: Chem.* **2012**, *55*, 1638-1647.
- [6] Shahini, C.; Achar, G.; Budagumpi, S.; Tacke, M.; Patil, S.A. Synthesis, structural investigation and antibacterial studies of non-symmetrically *p*-nitrobenzyl substituted benzimidazole *N*-heterocyclic carbene-silver(I) complexes. *Inorg. Chim. Acta* **2017**, *466*, 432-441.
- [7] Kaewnok, N.; Sirirak, J.; Jungsuttiwong, S.; Wongnongwa, Y.; Kamkaew, A.; Petdum, A.; Panchan, W.; Sahasithiwat, S.; Sooksimuang, T.; Charoenpanich, A.; Wanichacheva, N. Detection of hazardous mercury ion using [5]helicene-based fluorescence probe with “turn-on” sensing response for practical applications. *J. Hazard. Mater.* **2021**, *418*, 126242.
- [8] He, Y.L.; Li, N.; Li, W.K.; Zhang, X.X.; Zhang, X.; Liu, Z.X.; Liu, Q.Y. 5,10,15,20-Tetrakis (4-carboxylphenyl) porphyrin functionalized NiCo<sub>2</sub>S<sub>4</sub> yolk-shell nanospheres: Excellent peroxidase-like activity, catalytic mechanism and fast cascade colorimetric biosensor for cholesterol. *Sens. Actuators, B* **2021**, *326*, 128850.
- [9] Giri, D.; Bankura, A.; Patra, S.K. Poly(benzodithieno-imidazole-*alt*-carbazole) based pi-conjugated copolymers: Highly selective and sensitive turn-off fluorescent probes for Hg<sup>2+</sup>. *Polymer* **2018**, *158*, 338-353.

- [10] Li, W.T.; Zhang, X.N.; Hu, X.T.; Shi, Y.Q.; Li, Z.H.; Huang, X.W.; Zhang, W.; Zhang, D.; Zou, X.B.; Shi, J.Y. A smartphone-integrated ratiometric fluorescence sensor for visual detection of cadmium ions. *J. Hazard. Mater.* **2021**, *408*, 124872.
- [11] Du, Y.; Song, Y.H.; Hao, J.; Cai, K.Y.; Liu, N.; Yang, L.; Wang, L. Ratiometric fluorescence detection of  $O^{2-}$  (center dot-) based on dual-emission schiff base polymer/rhodamine-B nanocomposites. *Talanta* **2019**, *198*, 316-322.
- [12] Dong, S.L.; Wang, S.N.; Wang, X.L.; Zhai, L.Z. Superparamagnetic nanocomposite  $Fe_3O_4@SiO_2-NH_2/CQDs$  as fluorescent probe for copper (II) detection. *Mater. Lett.* **2020**, *278*, 128404.
- [13] Guo, X.R.; Huang, J.Z.; Wang, M.; Wang, L.S. A dual-emission water-soluble  $g-C_3N_4@AuNCs$ -based fluorescent probe for label-free and sensitive analysis of trace amounts of ferrous (II) and copper (II) ions. *Sens. Actuators, B* **2020**, *309*, 127766.
- [14] Guan, B.-B.; Li, Q.; Xu, Y.-T.; Chen, L.-H.; Wu, Z.-S.; Fan, Z.-L.; Zhu, W. Highly selective and sensitive detection towards cationic  $Cu^{2+}$  and  $Fe^{3+}$  contaminants via an In-MOF based dual-responsive fluorescence probe. *Inorg. Chem. Commun.* **2020**, *122*, 108273.
- [15] Du, T.; Wang, J.; Zhang, T.S.; Zhang, L.; Yang, C.Y.; Yue, T.L.; Sun, J.; Li, T.; Zhou, M.G.; Wang, J.L. An integrating platform of ratiometric fluorescent adsorbent for unconventional real-time removing and monitoring of copper ions. *ACS Appl. Mater. Interfaces* **2020**, *12*, 13189-13199.
- [16] Karakus, E.; Gunduz, S.; Liv, L.; Ozturk, T. Fluorescent and electrochemical detection of Cu (II) ions in aqueous environment by a novel, simple and readily available AIE probe. *J. Photochem. Photobiol., A* **2020**, *400*, 112702.
- [17] Li, Z.; Xu, Y.Q.; Xu, H.D.; Cui, M.Y.; Liu, T.G.; Ren, X.Y.; Sun, J.F.; Deng, D.W.; Gu, Y.Q.; Wang, P. A dicyanomethylene-4H-pyran-based fluorescence probe with high selectivity and sensitivity for detecting copper (II) and its bioimaging in living cells and tissue. *Spectrochim. Acta, Part A* **2021**, *244*, 118819.
- [18] Zhao, R.J.; Wang, Z.Z.; Tian, X.; Shu, H.; Yang, Y.; Xiao, X.C.; Wang, Y.D. Excellent fluorescence detection of  $Cu^{2+}$  in water system using *N*-acetyl-L-cysteines modified CdS quantum dots as fluorescence probe. *Nanotechnol.* **2021**, *32*, 405707.
- [19] Wang, P.; Sun, L.Y.; Wu, J.; Yang, X.P.; Lin, P.C.; Wang, M. A dual-functional colorimetric and fluorescent peptide-based probe for sequential detection of  $Cu^{2+}$  and  $S^{2-}$  in 100% aqueous buffered

- solutions and living cells. *J. Hazard. Mater.* **2021**, *407*, 124388.
- [10] Lei, C.; Qi, W.J.; Du, C.P.; Wang, Y.; Liu, C.; Huang, X.M.; Chang, X.J. A novel copper ion sensing fluorescent probe for fast detection of pyrophosphate and alkaline phosphatase. *New J. Chem.* **2021**, *45*, 3727-3734.
- [21] Pan, J.; Yu, J.M.; Qiu, S.Y.; Zhu, A.Y.; Liu, Y.; Ban, X.X.; Li, W.; Yu, H.; Li, L.T. A novel dibenzimidazole-based fluorescent probe with high sensitivity and selectivity for copper ions. *J. Photochem. Photobiol., A* **2021**, *406*, 113018.
- [22] Song, Y.T.; Tao, J.Y.; Wang, Y.; Cai, Z.C.; Fang, X.Y.; Wang, S.F.; Xu, H.J. A novel dual-responsive fluorescent probe for the detection of copper(II) and nickel(II) based on BODIPY derivatives. *Inorg. Chim. Acta* **2021**, *516*, 120099.
- [23] Yang, Q.; Deng, S.; Jin, L.Y.; Jiang, Y.L.; Jin, C.; Wang, B.X.; Shen, J. A novel mitochondria-targeted fluorescent probe based on carbon dots for Cu<sup>2+</sup> imaging in living cells and zebrafish. *J. Photochem. Photobiol., A* **2021**, *409*, 113143.
- [24] Zhou, Z.L.; Tang, H.H.; Chen, S.Y.; Huang, Y.H.; Zhu, X.H.; Li, H.T.; Zhang, Y.Y.; Yao, S.Z. A turn-on red-emitting fluorescent probe for determination of copper(II) ions in food samples and living zebrafish. *Food Chem.* **2021**, *343*, 128513.
- [25] Xu, P.P.; Liu, X.N.; Liu, L.; Zhu, W.J.; Li, C.; Fang, M. Carbazole-based colorimetric and fluorescent probe for Cu(II) and its utility in bio-imaging and real water samples. *J. Chin. Chem. Soc.* **2021**, *68*, 106-113.
- [26] Khan, S.A.; Ullah, Q.; Parveen, H.; Mukhtar, S.; Alzahrani, K.A.; Asad, M. Synthesis and photophysical investigation of novel imidazole derivative an efficient multimodal chemosensor for Cu(II) and fluoride ions. *J. Photochem. Photobiol., A* **2021**, *406*, 113022.
- [27] Rajasekaran, D.; Venkatachalam, K.; Periasamy, V. "On-off-on" pyrene-based fluorescent chemosensor for the selective recognition of Cu<sup>2+</sup> and S<sup>2-</sup> ions and its utilization in live cell imaging. *Appl. Organomet. Chem.* **2020**, *43*, 5342.
- [28] Wang, Y.; Hao, X.H.; Liang, L.X.; Gao, L.Y.; Ren, X.M.; Wu, Y.G.; Zhao, H.C. A coumarin-containing Schiff base fluorescent probe with AIE effect for the copper(ii) ion. *RSC Adv.* **2020**, *10*, 6109-6113.
- [29] Dong, M.; Tang, J.Y.; Lv, Y.F.; Liu, Y.T.; Wang, J.F.; Wang, T.T.; Bian, J.Y.; Li, C.J. A dual-function

fluorescent probe for Hg(II) and Cu(II) ions with two mutually independent sensing pathways and its logic gate behavior. *Spectrochim. Acta, Part A* **2020**, 226, 117645.

- [30] Wang, Y.; Zhou, J.T.; Zhao, L.; Xu, B.C. A dual-responsive and highly sensitive fluorescent probe for Cu<sup>2+</sup> and pH based on a dansyl derivative. *Dyes Pigm.* **2020**, 180, 108513.
- [31] Zhang, D.; Wang, Z.M.; Yang, J.; Yi, L.; Liao, L.F.; Xiao, X.L. Development of a method for the detection of Cu<sup>2+</sup> in the environment and live cells using a synthesized spider web-like fluorescent probe. *Biosens. Bioelectron.* **2021**, 182, 113174.
- [32] Sonkar, A.K.; Rai, A.; Tripathi, K.; Yadav, R.; Shukla, M.; Chauhan, B.S.; Srikrishna, S.; Mishra, L. A dual optical probe with larger stokes shift for simultaneous detection of Cu<sup>2+</sup> and Zn<sup>2+</sup> ions and aggregation induced enhanced emission empowering selective detection of Cu<sup>2+</sup> ions. *Sens. Actuators, B* **2021**, 327, 129011.
- [39] Shabunina, O.V.; Starnovskaya, E.S.; Shaitz, Y.K.; Kopchuk, D.S.; Sadieva, L.K.; Kim, G.A.; Taniya, O.S.; Nikonov, I.L.; Santra, S.; Zyryanov, G.V.; Charushin, V.N. A symmetrically substituted 5,5''-diaryl-2,2',6',2''-terpyridines as efficient fluorescence “turn-on” probes for Zn<sup>2+</sup> in food/cosmetic samples and human urine. *J. Photochem. Photobiol., A* **2021**, 408, 113101.
- [33] Sun, J.; Li, T.R.; Liu, C.; Xue, J.; Tian, L.M.; Liu, K.; Li, S.L.; Yang, Z.Y. A dual probe for selective sensing of Zn (II) by fluorescent and Cu (II) by colorimetric methods in different systems based on 7,8-benzochromone-3-carbaldehyde -(fluorescein)hydrazone. *J. Photochem. Photobiol., A* **2021**, 406, 113007.
- [34] Kaur, N.; Kaur, B. Anthracene possessing amide functionality as a turn-on fluorescent probe for Cu<sup>2+</sup> and Zn<sup>2+</sup> ions. *J. Coord. Chem.* **2021**, 74, 575-583.
- [35] Erdemir, S.; Malkondu, S. Dual-channel responsive fluorescent sensor for the logic-controlled detection and bioimaging of Zn<sup>2+</sup> and Hg<sup>2+</sup>. *J. Mol. Liq.* **2021**, 326, 115279.
- [36] Li, W.Y.; Liu, Z.C.; Fang, B.Q.; Jin, M.; Tian, Y. Two-photon fluorescent Zn<sup>2+</sup> probe for ratiometric imaging and biosensing of Zn<sup>2+</sup> in living cells and larval zebrafish. *Biosens. Bioelectron.* **2020**, 148, 111666.
- [37] Fang, H.B.; Geng, S.S.; Hao, M.G.; Chen, Q.X.; Liu, M.L.; Liu, C.Y.; Tian, Z.Q.; Wang, C.J.; Takebe, T.; Guan, J.L.; Chen, Y.C.; Guo, Z.J.; He, W.J.; Diao, J.J. Simultaneous Zn<sup>2+</sup> tracking in multiple organelles using super-resolution morphology-correlated organelle identification in living

cells. *Nat. Commun.* **2021**, *12*, 109.

- [38] Muthusamy, S.; Zhu, D.W.; Rajalakshmi, K.; Zhu, W.H.; Wang, S.J.; Lee, K.B.; Zhao, L. Successive detection of zinc ion and citrate using a schiff base chemosensor for enhanced prostate cancer diagnosis in biosystems. *ACS Appl. Bio Mater.* **2021**, *4*, 1932-1941.
- [39] Mohamad, N.S.; Zakaria, N.H.; Daud, N.; Tan, L.L.; Ta, G.C.; Heng, L.Y.; Hassan, N.I. The role of 8-amidoquinoline derivatives as fluorescent probes for zinc ion determination. *Sensors.* **2021**, *21*, 311.
- [40] Li, N.N.; Bi, C.F.; Zhang, X.; Xu, C.G.; Fan, C.B.; Gao, W.S.; Zong, Z.A.; Zu, S.S.; Niu, C.F.; Fan, Y.H. A bifunctional probe based on naphthalene derivative for absorbance-ratiometric detection of  $\text{Ag}^+$  and fluorescence "turn-on" sensing of  $\text{Zn}^{2+}$  and its practical application in water samples, walnut and living cells. *J. Photochem. Photobiol., A* **2020**, *390*, 112299.
- [41] Rajasekaran, D.; Venkatachalam, K.; Periasamy, V. A bisphenol based fluorescence chemosensor for the selective detection of  $\text{Zn}^{2+}$  and  $\text{PPi}$  ions and its bioluminescence imaging. *Spectrochim. Acta, Part A* **2020**, *242*, 118730.
- [42] Fu, J.X.; Chang, Y.X.; Li, B.; Wang, X.H.; Xie, X.M.; Xu, K.X. A dual fluorescence probe for  $\text{Zn}^{2+}$  and  $\text{Al}^{3+}$  through differentially response and bioimaging in living cells. *Spectrochim. Acta, Part A* **2020**, *225*, 117493.
- [43] Shang, Y.F.; Wang, H.L.; Bai, H. A coumarin-based turn-on chemosensor for selective detection of  $\text{Zn(II)}$  and application in live cell imaging. *Spectrochim. Acta, Part A* **2020**, *228*, 117746.
- [44] Chen, S.S.; Sun, T.T.; Xie, Z.G.; Dong, D.W.; Zhang, N. A fluorescent sensor for intracellular  $\text{Zn}^{2+}$  based on cylindrical molecular brushes of poly(2-oxazoline) through ion-induced emission. *Polym. Chem.* **2020**, *11*, 6650-6657.
- [45] Nguyen, M.H.; Nguyen, T.N.; Do, D.Q.; Nguyen, H.H.; Phung, Q.M.; Thirumalaivasan, N.; Wu, S.P.; Dinh, T.H. A highly selective fluorescent anthracene-based chemosensor for imaging  $\text{Zn}^{2+}$  in living cells and zebrafish. *Inorg. Chem. Commun.* **2020**, *115*, 107882.
- [46] Hu, Y. Du, L.C.; Yang, J. A highly sensitive and selective chemosensors for detection of  $\text{Zn}^{2+}$  and its application in live cell imaging. *Inorg. Chim. Acta* **2020**, *509*, 119675.
- [47] Wang, Y.Y.; Duan, H.N.; Shi, H.Y.; Zhang, S.W.; Xu, Y.F.; Zhu, W.P.; Qian, X.H. A highly sensitive fluorescent probe for tracking intracellular zinc ions and direct imaging of prostatic tissue in mice.



*Chin. Chem. Lett* **2020**, *31*, 2933-2936.

- [48] Musib, D.; Devi, L.R.; Raza, M.K.; Chanu, S.B.; Roy, M. A new thiophene-based aggregation-induced emission chemosensor for selective detection of  $\text{Zn}^{2+}$  ions and its turn off. *Chem. Lett.* **2020**, *49*, 473-476.
- [49] Liu, T.T.; Xu, J.; Liu, C.G.; Zeng, S.; Xing, Z.Y.; Sun, X.J.; Li, J.L. A novel dual-function probe for recognition and differentiation of  $\text{Zn}^{2+}$  and  $\text{Al}^{3+}$  and its application. *J. Mol. Liq.* **2020**, *300*, 112250.
